# Supplementary material for: An integrated strategy for highly sensitive phosphoproteome analysis from low micrograms of protein samples
Source: Royal Society of Chemistry journal article supplement (doi:10.1039/c8an00792f), 2018-01-01
Supplement: c8an00792f6.xlsx [file c8an00792f6.xlsx]

## Sheet: novel phosphosites
Leading.proteins	Protein.names	Gene.names	phosphosite
A0FGR9	Extended synaptotagmin-3	ESYT3	S138
A1KZ92	Peroxidasin-like protein	PXDNL	S1285
A1KZ92	Peroxidasin-like protein	PXDNL	Y1277
A1KZ92	Peroxidasin-like protein	PXDNL	Y1281
A1L390	Pleckstrin homology domain-containing family G member 3	PLEKHG3	S432
A2RU30	Protein TESPA1	TESPA1	S219
A4D1S0	Killer cell lectin-like receptor subfamily G member 2	KLRG2	S162
A6NKW6	Membrane protein FAM159B	FAM159B	S128
A6NKW6	Membrane protein FAM159B	FAM159B	S132
A6NKW6	Membrane protein FAM159B	FAM159B	T135
A6NKW6	Membrane protein FAM159B	FAM159B	T138
A6NKW6	Membrane protein FAM159B	FAM159B	Y139
A6NNY8	Ubiquitin carboxyl-terminal hydrolase 27	USP27X	S71
A7XYQ1	Sine oculis-binding protein homolog	SOBP	S313
A8MUH7	Putative PDZ domain-containing protein 1P;Na(+)/H(+) exchange regulatory cofactor NHE-RF3	PDZK1P1	S355
A8MUH7	Putative PDZ domain-containing protein 1P;Na(+)/H(+) exchange regulatory cofactor NHE-RF3	PDZK1P1	S356
A8MVX0	Rho guanine nucleotide exchange factor 33	ARHGEF33	S530
A8MXP9	Matrin-3	MATR3	S206
A8MXP9	Matrin-3	MATR3	S533
A8MXP9	Matrin-3	MATR3	S511
A8MXP9	Matrin-3	MATR3	Y171
A9Z1X7	Serine/arginine repetitive matrix protein 1	SRRM1	S883
A9Z1X7	Serine/arginine repetitive matrix protein 1	SRRM1	S786
A9Z1X7	Serine/arginine repetitive matrix protein 1	SRRM1	T855
B2RTY4	Unconventional myosin-IXa	MYO9A	S2293
B7ZC06	Golgin subfamily A member 2	GOLGA2	S465
E7EV07		ARHGEF4	S134
E7EV07		ARHGEF4	S666
E7EV07		ARHGEF4	S677
E7EV07		ARHGEF4	S1144
E7EV07		ARHGEF4	S1058
E7EV07		ARHGEF4	S516
E7EV07		ARHGEF4	T1143
E7EVA0	Microtubule-associated protein;Microtubule-associated protein 4	MAP4	S375
E7EVA0	Microtubule-associated protein;Microtubule-associated protein 4	MAP4	S297
E7EVA0	Microtubule-associated protein;Microtubule-associated protein 4	MAP4	S524
E7EVA0	Microtubule-associated protein;Microtubule-associated protein 4	MAP4	S527
E7EVA0	Microtubule-associated protein;Microtubule-associated protein 4	MAP4	S641
E7EVA0	Microtubule-associated protein;Microtubule-associated protein 4	MAP4	S653
E7EVA0	Microtubule-associated protein;Microtubule-associated protein 4	MAP4	S1887
E7EVA0	Microtubule-associated protein;Microtubule-associated protein 4	MAP4	S2073
E7EVA0	Microtubule-associated protein;Microtubule-associated protein 4	MAP4	S116
E7EVA0	Microtubule-associated protein;Microtubule-associated protein 4	MAP4	S2021
E7EVA0	Microtubule-associated protein;Microtubule-associated protein 4	MAP4	S2218
E7EVA0	Microtubule-associated protein;Microtubule-associated protein 4	MAP4	T588
E7EVA0	Microtubule-associated protein;Microtubule-associated protein 4	MAP4	T602
E7EVA0	Microtubule-associated protein;Microtubule-associated protein 4	MAP4	T538
E7EVA0	Microtubule-associated protein;Microtubule-associated protein 4	MAP4	T2295
E7EVA0	Microtubule-associated protein;Microtubule-associated protein 4	MAP4	T118
E7EVA0	Microtubule-associated protein;Microtubule-associated protein 4	MAP4	Y47
J3KN59	BCL2/adenovirus E1B 19 kDa protein-interacting protein 2	BNIP2	S235
J3KN59	BCL2/adenovirus E1B 19 kDa protein-interacting protein 2	BNIP2	Y239
J3KNL6	Protein transport protein Sec16A	SEC16A	S2291
J3KNZ9	Probable fibrosin-1	FBRS	S750
J3KNZ9	Probable fibrosin-1	FBRS	S968
J3KNZ9	Probable fibrosin-1	FBRS	T941
J3QT09	Sentrin-specific protease 7	SENP7	S378
J3QT09	Sentrin-specific protease 7	SENP7	S379
J3QT09	Sentrin-specific protease 7	SENP7	S46
O14654	Insulin receptor substrate 4	IRS4	S431
O14654	Insulin receptor substrate 4	IRS4	S917
O14654	Insulin receptor substrate 4	IRS4	S918
O14654	Insulin receptor substrate 4	IRS4	S931
O14654	Insulin receptor substrate 4	IRS4	S846
O14654	Insulin receptor substrate 4	IRS4	S461
O14654	Insulin receptor substrate 4	IRS4	S463
O14654	Insulin receptor substrate 4	IRS4	S893
O14654	Insulin receptor substrate 4	IRS4	S1089
O14654	Insulin receptor substrate 4	IRS4	Y336
O14654	Insulin receptor substrate 4	IRS4	Y487
O14654	Insulin receptor substrate 4	IRS4	Y847
O14654	Insulin receptor substrate 4	IRS4	Y1046
O14654	Insulin receptor substrate 4	IRS4	Y656
O14686	Histone-lysine N-methyltransferase 2D	KMT2D	S1873
O14862	Interferon-inducible protein AIM2	AIM2	S328
O14862	Interferon-inducible protein AIM2	AIM2	T327
O15047	Histone-lysine N-methyltransferase SETD1A	SETD1A	S532
O15047	Histone-lysine N-methyltransferase SETD1A	SETD1A	S1517
O15119	T-box transcription factor TBX3	TBX3	S705
O15205	Ubiquitin D	UBD	S65
O15350	Tumor protein p73	TP73	S412
O15357	Phosphatidylinositol 3,4,5-trisphosphate 5-phosphatase 2	INPPL1	S300
O43149	Zinc finger ZZ-type and EF-hand domain-containing protein 1	ZZEF1	S938
O43242	26S proteasome non-ATPase regulatory subunit 3	PSMD3	S411
O43242	26S proteasome non-ATPase regulatory subunit 3	PSMD3	S415
O43497	Voltage-dependent T-type calcium channel subunit alpha-1G	CACNA1G	S2090
O43497	Voltage-dependent T-type calcium channel subunit alpha-1G	CACNA1G	T2089
O43497	Voltage-dependent T-type calcium channel subunit alpha-1G	CACNA1G	Y2091
O43524	Forkhead box protein O3	FOXO3	S300
O60239	SH3 domain-binding protein 5	SH3BP5	S405
O60239	SH3 domain-binding protein 5	SH3BP5	S406
O60239	SH3 domain-binding protein 5	SH3BP5	S407
O60239	SH3 domain-binding protein 5	SH3BP5	S414
O60307	Microtubule-associated serine/threonine-protein kinase 3	MAST3	S351
O60312	Probable phospholipid-transporting ATPase VA	ATP10A	S780
O60449	Lymphocyte antigen 75	LY75	S729
O60500	Nephrin	NPHS1	S300
O60500	Nephrin	NPHS1	T305
O60664	Perilipin-3	PLIN3	S127
O60673	DNA polymerase zeta catalytic subunit	REV3L	S1552
O60673	DNA polymerase zeta catalytic subunit	REV3L	T1574
O75061	Putative tyrosine-protein phosphatase auxilin	DNAJC6	S17
O75121	Microfibrillar-associated protein 3-like	MFAP3L	S407
O75146	Huntingtin-interacting protein 1-related protein	HIP1R	S771
O75161	Nephrocystin-4	NPHP4	S868
O75179	Ankyrin repeat domain-containing protein 17	ANKRD17	S237
O75420	PERQ amino acid-rich with GYF domain-containing protein 1	GIGYF1	S412
O75592	E3 ubiquitin-protein ligase MYCBP2	MYCBP2	S2643
O75899	Gamma-aminobutyric acid type B receptor subunit 2	GABBR2	S324
O75923	Dysferlin	DYSF	S423
O75923	Dysferlin	DYSF	S431
O94776	Metastasis-associated protein MTA2	MTA2	S573
O94854	Uncharacterized protein KIAA0754	KIAA0754	S15
O94964	Protein SOGA1;N-terminal form;C-terminal 80 kDa form	SOGA1	S143
O94991	SLIT and NTRK-like protein 5	SLITRK5	S834
O94991	SLIT and NTRK-like protein 5	SLITRK5	Y855
O95136	Sphingosine 1-phosphate receptor 2	S1PR2	S32
O95136	Sphingosine 1-phosphate receptor 2	S1PR2	T27
O95155	Ubiquitin conjugation factor E4 B	UBE4B	S311
O95793	Double-stranded RNA-binding protein Staufen homolog 1	STAU1	S397
O95801	Tetratricopeptide repeat protein 4	TTC4	S245
P00338	L-lactate dehydrogenase A chain	LDHA	S105
P01023	Alpha-2-macroglobulin	A2M	S928
P01023	Alpha-2-macroglobulin	A2M	S943
P01023	Alpha-2-macroglobulin	A2M	T914
P01023	Alpha-2-macroglobulin	A2M	T915
P03951	Coagulation factor XI;Coagulation factor XIa heavy chain;Coagulation factor XIa light chain	F11	S495
P04035	3-hydroxy-3-methylglutaryl-coenzyme A reductase	HMGCR	S384
P04114	Apolipoprotein B-100;Apolipoprotein B-48	APOB	S3777
P07384	Calpain-1 catalytic subunit	CAPN1	S575
P08476	Inhibin beta A chain	INHBA	S50
P08F94	Fibrocystin	PKHD1	S630
P09848	Lactase-phlorizin hydrolase;Lactase;Phlorizin hydrolase	LCT	S865
P09848	Lactase-phlorizin hydrolase;Lactase;Phlorizin hydrolase	LCT	T860
P0DMS8	Adenosine receptor A3	ADORA3	S215
P10071	Transcriptional activator GLI3;Transcriptional repressor GLI3R	GLI3	S186
P10071	Transcriptional activator GLI3;Transcriptional repressor GLI3R	GLI3	S188
P10114	Ras-related protein Rap-2a	RAP2A	S149
P10114	Ras-related protein Rap-2a	RAP2A	Y166
P12757	Ski-like protein	SKIL	S431
P12757	Ski-like protein	SKIL	S435
P12882	Myosin-1	MYH1	S285
P13612	Integrin alpha-4	ITGA4	S140
P13612	Integrin alpha-4	ITGA4	T143
P13796	Plastin-2	LCP1	S535
P13796	Plastin-2	LCP1	S536
P13796	Plastin-2	LCP1	S537
P13796	Plastin-2	LCP1	S539
P15121	Aldose reductase	AKR1B1	S227
P17098	Zinc finger protein 8	ZNF8	S185
P17482	Homeobox protein Hox-B9	HOXB9	S67
P18031	Tyrosine-protein phosphatase non-receptor type 1;Tyrosine-protein phosphatase non-receptor type	PTPN1	S104
P18583	Protein SON	SON	S1002
P18583	Protein SON	SON	T1691
P19338	Nucleolin	NCL	S479
P19338	Nucleolin	NCL	S485
P21439	Multidrug resistance protein 3	ABCB4	S1275
P21439	Multidrug resistance protein 3	ABCB4	T1262
P21439	Multidrug resistance protein 3	ABCB4	Y1273
P22314	Ubiquitin-like modifier-activating enzyme 1	UBA1	S276
P22413	Ectonucleotide pyrophosphatase/phosphodiesterase family member 1;Alkaline phosphodiesterase I;Nucleotide pyrophosphatase	ENPP1	S34
P22681	E3 ubiquitin-protein ligase CBL	CBL	S899
P23471	Receptor-type tyrosine-protein phosphatase zeta	PTPRZ1	S2033
P24928	DNA-directed RNA polymerase II subunit RPB1;DNA-directed RNA polymerase	POLR2A	S1030
P24928	DNA-directed RNA polymerase II subunit RPB1;DNA-directed RNA polymerase	POLR2A	S867
P24928	DNA-directed RNA polymerase II subunit RPB1;DNA-directed RNA polymerase	POLR2A	S882
P24928	DNA-directed RNA polymerase II subunit RPB1;DNA-directed RNA polymerase	POLR2A	T878
P25054	Adenomatous polyposis coli protein	APC	S1754
P25054	Adenomatous polyposis coli protein	APC	S1756
P25054	Adenomatous polyposis coli protein	APC	S1757
P25054	Adenomatous polyposis coli protein	APC	S1758
P25054	Adenomatous polyposis coli protein	APC	Y1135
P27540	Aryl hydrocarbon receptor nuclear translocator	ARNT	S496
P28288	ATP-binding cassette sub-family D member 3	ABCD3	S368
P28290	Sperm-specific antigen 2	SSFA2	S1045
P29033	Gap junction beta-2 protein	GJB2	S19
P29033	Gap junction beta-2 protein	GJB2	T18
P29973	cGMP-gated cation channel alpha-1	CNGA1	S650
P29973	cGMP-gated cation channel alpha-1	CNGA1	Y648
P32320	Cytidine deaminase	CDA	S97
P34810	Macrosialin	CD68	S194
P34903	Gamma-aminobutyric acid receptor subunit alpha-3	GABRA3	S453
P34903	Gamma-aminobutyric acid receptor subunit alpha-3	GABRA3	S459
P35125	Ubiquitin carboxyl-terminal hydrolase 6	USP6	S1176
P37275	Zinc finger E-box-binding homeobox 1	ZEB1	S1113
P38606	V-type proton ATPase catalytic subunit A	ATP6V1A	S188
P38606	V-type proton ATPase catalytic subunit A	ATP6V1A	Y185
P38919	Eukaryotic initiation factor 4A-III;Eukaryotic initiation factor 4A-III, N-terminally processed	EIF4A3	S333
P38919	Eukaryotic initiation factor 4A-III;Eukaryotic initiation factor 4A-III, N-terminally processed	EIF4A3	S347
P38919	Eukaryotic initiation factor 4A-III;Eukaryotic initiation factor 4A-III, N-terminally processed	EIF4A3	Y352
P39880	Homeobox protein cut-like 1	CUX1	S914
P40617	ADP-ribosylation factor-like protein 4A	ARL4A	S141
P40617	ADP-ribosylation factor-like protein 4A	ARL4A	S143
P40617	ADP-ribosylation factor-like protein 4A	ARL4A	S145
P41226	Ubiquitin-like modifier-activating enzyme 7	UBA7	S475
P42680	Tyrosine-protein kinase Tec	TEC	S151
P42858	Huntingtin	HTT	S2460
P42858	Huntingtin	HTT	S2114
P42858	Huntingtin	HTT	T2455
P42858	Huntingtin	HTT	Y2451
P43320	Beta-crystallin B2	CRYBB2	S3
P43320	Beta-crystallin B2	CRYBB2	S14
P48165	Gap junction alpha-8 protein	GJA8	S128
P48165	Gap junction alpha-8 protein	GJA8	T120
P48426	Phosphatidylinositol 5-phosphate 4-kinase type-2 alpha	PIP4K2A	S86
P48552	Nuclear receptor-interacting protein 1	NRIP1	S90
P48634	Protein PRRC2A	PRRC2A	S1788
P48723	Heat shock 70 kDa protein 13	HSPA13	S280
P49454	Centromere protein F	CENPF	S2568
P49454	Centromere protein F	CENPF	S2569
P49454	Centromere protein F	CENPF	S841
P49454	Centromere protein F	CENPF	S847
P49454	Centromere protein F	CENPF	T1247
P49736	DNA replication licensing factor MCM2	MCM2	S809
P49757	Protein numb homolog	NUMB	S303
P49757	Protein numb homolog	NUMB	T304
P49916	DNA ligase 3	LIG3	S402
P49916	DNA ligase 3	LIG3	S524
P50458	LIM/homeobox protein Lhx2	LHX2	S5
P50458	LIM/homeobox protein Lhx2	LHX2	S7
P52209	6-phosphogluconate dehydrogenase, decarboxylating	PGD	S37
P57086	SCAN domain-containing protein 1	SCAND1	S51
P58304	Visual system homeobox 2	VSX2	S325
P58304	Visual system homeobox 2	VSX2	S329
P62191	26S protease regulatory subunit 4	PSMC1	S149
P62191	26S protease regulatory subunit 4	PSMC1	Y184
P62805	Histone H4	HIST1H4A	S48
P62805	Histone H4	HIST1H4A	Y52
P78536	Disintegrin and metalloproteinase domain-containing protein 17	ADAM17	S266
P78536	Disintegrin and metalloproteinase domain-containing protein 17	ADAM17	T265
P78536	Disintegrin and metalloproteinase domain-containing protein 17	ADAM17	Y262
P80108	Phosphatidylinositol-glycan-specific phospholipase D	GPLD1	S777
P82909	28S ribosomal protein S36, mitochondrial	MRPS36	S59
P98172	Ephrin-B1	EFNB1	S36
P98172	Ephrin-B1	EFNB1	S38
P98172	Ephrin-B1	EFNB1	T26
P98182	Zinc finger protein 200	ZNF200	S182
Q00587	Cdc42 effector protein 1	CDC42EP1	S153
Q01780	Exosome component 10	EXOSC10	S766
Q01804	OTU domain-containing protein 4	OTUD4	S349
Q02952	A-kinase anchor protein 12	AKAP12	S850
Q03164	Histone-lysine N-methyltransferase 2A;MLL cleavage product N320;MLL cleavage product C180	KMT2A	S938
Q05D32	CTD small phosphatase-like protein 2	CTDSPL2	S161
Q0VD83	Apolipoprotein B receptor	APOBR	S1031
Q0VD83	Apolipoprotein B receptor	APOBR	T1011
Q12789	General transcription factor 3C polypeptide 1	GTF3C1	S848
Q12846	Syntaxin-4	STX4	S143
Q12846	Syntaxin-4	STX4	S146
Q12846	Syntaxin-4	STX4	S131
Q12923	Tyrosine-protein phosphatase non-receptor type 13	PTPN13	S941
Q12923	Tyrosine-protein phosphatase non-receptor type 13	PTPN13	Y321
Q12923	Tyrosine-protein phosphatase non-receptor type 13	PTPN13	Y465
Q12923	Tyrosine-protein phosphatase non-receptor type 13	PTPN13	Y979
Q12923	Tyrosine-protein phosphatase non-receptor type 13	PTPN13	Y2112
Q12955	Ankyrin-3	ANK3	S4026
Q12955	Ankyrin-3	ANK3	S4031
Q12955	Ankyrin-3	ANK3	T4032
Q13029	PR domain zinc finger protein 2	PRDM2	S384
Q13042	Cell division cycle protein 16 homolog	CDC16	S33
Q13042	Cell division cycle protein 16 homolog	CDC16	T578
Q13042	Cell division cycle protein 16 homolog	CDC16	Y41
Q13224	Glutamate receptor ionotropic, NMDA 2B	GRIN2B	S886
Q13224	Glutamate receptor ionotropic, NMDA 2B	GRIN2B	Y699
Q13315	Serine-protein kinase ATM	ATM	S614
Q13315	Serine-protein kinase ATM	ATM	S629
Q13315	Serine-protein kinase ATM	ATM	T616
Q13395	Probable methyltransferase TARBP1	TARBP1	S1318
Q13395	Probable methyltransferase TARBP1	TARBP1	S1319
Q13395	Probable methyltransferase TARBP1	TARBP1	T1313
Q13439	Golgin subfamily A member 4	GOLGA4	S1119
Q13439	Golgin subfamily A member 4	GOLGA4	S1124
Q13873	Bone morphogenetic protein receptor type-2	BMPR2	S940
Q14126	Desmoglein-2	DSG2	S913
Q14126	Desmoglein-2	DSG2	S914
Q14320	Protein FAM50A	FAM50A	S43
Q14576	ELAV-like protein 3	ELAVL3	S222
Q14669	E3 ubiquitin-protein ligase TRIP12	TRIP12	S1506
Q14669	E3 ubiquitin-protein ligase TRIP12	TRIP12	S102
Q14689	Disco-interacting protein 2 homolog A	DIP2A	S154
Q14690	Protein RRP5 homolog	PDCD11	S1010
Q14789	Golgin subfamily B member 1	GOLGB1	S2833
Q14789	Golgin subfamily B member 1	GOLGB1	S539
Q15173	Serine/threonine-protein phosphatase 2A 56 kDa regulatory subunit beta isoform	PPP2R5B	S349
Q15424	Scaffold attachment factor B1	SAFB	S510
Q15424	Scaffold attachment factor B1	SAFB	T511
Q15643	Thyroid receptor-interacting protein 11	TRIP11	S630
Q15643	Thyroid receptor-interacting protein 11	TRIP11	T642
Q15650	Activating signal cointegrator 1	TRIP4	S142
Q15751	Probable E3 ubiquitin-protein ligase HERC1	HERC1	S1033
Q15858	Sodium channel protein type 9 subunit alpha	SCN9A	S1047
Q15858	Sodium channel protein type 9 subunit alpha	SCN9A	Y1037
Q15911	Zinc finger homeobox protein 3	ZFHX3	S1347
Q15911	Zinc finger homeobox protein 3	ZFHX3	S1358
Q16649	Nuclear factor interleukin-3-regulated protein	NFIL3	S382
Q16649	Nuclear factor interleukin-3-regulated protein	NFIL3	T379
Q17RS7	Flap endonuclease GEN homolog 1	GEN1	S683
Q17RS7	Flap endonuclease GEN homolog 1	GEN1	T680
Q19T08	Endothelial cell-specific chemotaxis regulator	ECSCR	S97
Q2LD37	Uncharacterized protein KIAA1109	KIAA1109	S1677
Q2M1Z3	Rho GTPase-activating protein 31	ARHGAP31	S141
Q2M1Z3	Rho GTPase-activating protein 31	ARHGAP31	Y143
Q2M3C6	Transmembrane protein C15orf27	C15orf27	S467
Q2M3C6	Transmembrane protein C15orf27	C15orf27	S471
Q2M3C6	Transmembrane protein C15orf27	C15orf27	S475
Q2VIQ3	Chromosome-associated kinesin KIF4B	KIF4B	S936
Q2VIQ3	Chromosome-associated kinesin KIF4B	KIF4B	Y933
Q3SY00	Testis-specific protein 10-interacting protein	TSGA10IP	S219
Q3T8J9	GON-4-like protein	GON4L	S2099
Q495X7	Tripartite motif-containing protein 60	TRIM60	S244
Q495X7	Tripartite motif-containing protein 60	TRIM60	S254
Q4KWH8	1-phosphatidylinositol 4,5-bisphosphate phosphodiesterase eta-1	PLCH1	S1630
Q4LE39	AT-rich interactive domain-containing protein 4B	ARID4B	S680
Q4LE39	AT-rich interactive domain-containing protein 4B	ARID4B	T481
Q4VCS5	Angiomotin	AMOT	S839
Q4VCS5	Angiomotin	AMOT	S847
Q4VCS5	Angiomotin	AMOT	S200
Q4VCS5	Angiomotin	AMOT	S416
Q4VCS5	Angiomotin	AMOT	S442
Q4VCS5	Angiomotin	AMOT	S264
Q4VCS5	Angiomotin	AMOT	S313
Q4VCS5	Angiomotin	AMOT	S325
Q4VCS5	Angiomotin	AMOT	S328
Q4VCS5	Angiomotin	AMOT	S301
Q4VCS5	Angiomotin	AMOT	T840
Q4VCS5	Angiomotin	AMOT	T108
Q4VCS5	Angiomotin	AMOT	Y832
Q4VCS5	Angiomotin	AMOT	Y367
Q4VCS5	Angiomotin	AMOT	Y685
Q4VCS5	Angiomotin	AMOT	Y287
Q562F6	Shugoshin-like 2	SGOL2	S72
Q562F6	Shugoshin-like 2	SGOL2	Y504
Q58DX5	Inactive N-acetylated-alpha-linked acidic dipeptidase-like protein 2	NAALADL2	S404
Q58DX5	Inactive N-acetylated-alpha-linked acidic dipeptidase-like protein 2	NAALADL2	S405
Q5JRA6	Melanoma inhibitory activity protein 3	MIA3	S1323
Q5JSZ5	Protein PRRC2B	PRRC2B	S1221
Q5JSZ5	Protein PRRC2B	PRRC2B	T2156
Q5JTC6	APC membrane recruitment protein 1	AMER1	S175
Q5JTC6	APC membrane recruitment protein 1	AMER1	Y1102
Q5JTH9	RRP12-like protein	RRP12	S953
Q5JTH9	RRP12-like protein	RRP12	T937
Q5JTH9	RRP12-like protein	RRP12	T939
Q5JXC2	Migration and invasion-inhibitory protein	MIIP	S307
Q5K651	Sterile alpha motif domain-containing protein 9	SAMD9	S634
Q5K651	Sterile alpha motif domain-containing protein 9	SAMD9	S638
Q5K651	Sterile alpha motif domain-containing protein 9	SAMD9	T639
Q5SW79	Centrosomal protein of 170 kDa	CEP170	S485
Q5T1H1	Protein eyes shut homolog	EYS	S2729
Q5T1H1	Protein eyes shut homolog	EYS	S2732
Q5T3J3	Ligand-dependent nuclear receptor-interacting factor 1	LRIF1	S2
Q5T4S7	E3 ubiquitin-protein ligase UBR4	UBR4	S2912
Q5T890	DNA excision repair protein ERCC-6-like 2	ERCC6L2	S1290
Q5T890	DNA excision repair protein ERCC-6-like 2	ERCC6L2	S1462
Q5T9A4	ATPase family AAA domain-containing protein 3B	ATAD3B	S629
Q5TEA3	Uncharacterized protein C20orf194	C20orf194	S45
Q5TEA6	Protein sel-1 homolog 2	SEL1L2	S217
Q5TEA6	Protein sel-1 homolog 2	SEL1L2	S121
Q5TEA6	Protein sel-1 homolog 2	SEL1L2	T207
Q5TH74	O(6)-methylguanine-induced apoptosis 2	STPG1	S286
Q5THK1	Protein PRR14L	PRR14L	S1865
Q5THK1	Protein PRR14L	PRR14L	S1868
Q5THK1	Protein PRR14L	PRR14L	T1854
Q5THK1	Protein PRR14L	PRR14L	T1857
Q5U5Q3	RNA-binding E3 ubiquitin-protein ligase MEX3C	MEX3C	S61
Q5UE93	Phosphoinositide 3-kinase regulatory subunit 6	PIK3R6	S680
Q5UE93	Phosphoinositide 3-kinase regulatory subunit 6	PIK3R6	S689
Q5VU65	Nuclear pore membrane glycoprotein 210-like	NUP210L	S435
Q5VUA4	Zinc finger protein 318	ZNF318	S1914
Q5VUA4	Zinc finger protein 318	ZNF318	Y236
Q5VUJ6	Leucine-rich repeat and calponin homology domain-containing protein 2	LRCH2	S550
Q5VUJ6	Leucine-rich repeat and calponin homology domain-containing protein 2	LRCH2	S512
Q5VUJ6	Leucine-rich repeat and calponin homology domain-containing protein 2	LRCH2	S518
Q5VUJ6	Leucine-rich repeat and calponin homology domain-containing protein 2	LRCH2	S608
Q5VV63	Attractin-like protein 1	ATRNL1	S472
Q5VWC4		PSMD4	S259
Q63HK5	Teashirt homolog 3	TSHZ3	S92
Q63HK5	Teashirt homolog 3	TSHZ3	T1021
Q68D20	Protein PMS2CL;Mismatch repair endonuclease PMS2	PMS2CL	S17
Q68D20	Protein PMS2CL;Mismatch repair endonuclease PMS2	PMS2CL	S19
Q68D51	DENN domain-containing protein 2C	DENND2C	S184
Q68D51	DENN domain-containing protein 2C	DENND2C	S221
Q68D51	DENN domain-containing protein 2C	DENND2C	Y322
Q68D51	DENN domain-containing protein 2C	DENND2C	Y237
Q6AI39	GLTSCR1-like protein	GLTSCR1L	S916
Q6AI39	GLTSCR1-like protein	GLTSCR1L	S918
Q6AI39	GLTSCR1-like protein	GLTSCR1L	T917
Q6AI39	GLTSCR1-like protein	GLTSCR1L	Y914
Q6AWC2	Protein WWC2	WWC2	S1081
Q6AWC2	Protein WWC2	WWC2	Y632
Q6B0I6	Lysine-specific demethylase 4D	KDM4D	S505
Q6KC79	Nipped-B-like protein	NIPBL	S119
Q6KC79	Nipped-B-like protein	NIPBL	T970
Q6NUJ5	PWWP domain-containing protein 2B	PWWP2B	S82
Q6P2H3	Centrosomal protein of 85 kDa	CEP85	S417
Q6P2S7	Tetratricopeptide repeat protein GNN	GNN	S335
Q6P2S7	Tetratricopeptide repeat protein GNN	GNN	S340
Q6PCE3	Glucose 1,6-bisphosphate synthase	PGM2L1	S390
Q6PCE3	Glucose 1,6-bisphosphate synthase	PGM2L1	S391
Q6PJP8	DNA cross-link repair 1A protein	DCLRE1A	S491
Q6PKG0	La-related protein 1	LARP1	S416
Q6PL24	Protein TMED8	TMED8	S62
Q6PL24	Protein TMED8	TMED8	S74
Q6TGC4	Protein-arginine deiminase type-6	PADI6	S183
Q6TGC4	Protein-arginine deiminase type-6	PADI6	S200
Q6TGC4	Protein-arginine deiminase type-6	PADI6	T187
Q6TGC4	Protein-arginine deiminase type-6	PADI6	T193
Q6UWJ1	Transmembrane and coiled-coil domain-containing protein 3	TMCO3	S493
Q6XUX3	Dual serine/threonine and tyrosine protein kinase	DSTYK	S509
Q6YHU6	Thyroid adenoma-associated protein	THADA	S516
Q6YHU6	Thyroid adenoma-associated protein	THADA	S517
Q6YN16	Hydroxysteroid dehydrogenase-like protein 2	HSDL2	S133
Q6YN16	Hydroxysteroid dehydrogenase-like protein 2	HSDL2	T129
Q6YN16	Hydroxysteroid dehydrogenase-like protein 2	HSDL2	Y130
Q6ZN18	Zinc finger protein AEBP2	AEBP2	S217
Q702N8	Xin actin-binding repeat-containing protein 1	XIRP1	S641
Q702N8	Xin actin-binding repeat-containing protein 1	XIRP1	T627
Q709C8	Vacuolar protein sorting-associated protein 13C	VPS13C	S1117
Q709C8	Vacuolar protein sorting-associated protein 13C	VPS13C	S1120
Q709C8	Vacuolar protein sorting-associated protein 13C	VPS13C	T2533
Q70JA7	Chondroitin sulfate synthase 3	CHSY3	S411
Q70JA7	Chondroitin sulfate synthase 3	CHSY3	Y401
Q70JA7	Chondroitin sulfate synthase 3	CHSY3	Y403
Q71F56	Mediator of RNA polymerase II transcription subunit 13-like	MED13L	S1130
Q76M96	Coiled-coil domain-containing protein 80	CCDC80	S134
Q76M96	Coiled-coil domain-containing protein 80	CCDC80	S144
Q7L804	Rab11 family-interacting protein 2	RAB11FIP2	S224
Q7Z2K8	G protein-regulated inducer of neurite outgrowth 1	GPRIN1	S799
Q7Z2W4	Zinc finger CCCH-type antiviral protein 1	ZC3HAV1	S502
Q7Z333	Probable helicase senataxin	SETX	S1345
Q7Z3J3	RanBP2-like and GRIP domain-containing protein 4	RGPD4	S1622
Q7Z6J0	E3 ubiquitin-protein ligase SH3RF1	SH3RF1	S512
Q7Z6J0	E3 ubiquitin-protein ligase SH3RF1	SH3RF1	S519
Q7Z6J0	E3 ubiquitin-protein ligase SH3RF1	SH3RF1	S525
Q7Z7G8	Vacuolar protein sorting-associated protein 13B	VPS13B	S2079
Q86T24	Transcriptional regulator Kaiso	ZBTB33	S21
Q86T24	Transcriptional regulator Kaiso	ZBTB33	Y434
Q86TV6	Tetratricopeptide repeat protein 7B	TTC7B	S760
Q86TV6	Tetratricopeptide repeat protein 7B	TTC7B	S766
Q86TV6	Tetratricopeptide repeat protein 7B	TTC7B	T762
Q86V48	Leucine zipper protein 1	LUZP1	S638
Q86V59	PNMA-like protein 1	PNMAL1	S250
Q86V97	Kelch repeat and BTB domain-containing protein 6	KBTBD6	S204
Q86V97	Kelch repeat and BTB domain-containing protein 6	KBTBD6	S208
Q86VQ1	Glucocorticoid-induced transcript 1 protein	GLCCI1	S499
Q86XL3	Ankyrin repeat and LEM domain-containing protein 2	ANKLE2	S868
Q86YC2	Partner and localizer of BRCA2	PALB2	S70
Q86YC2	Partner and localizer of BRCA2	PALB2	T386
Q8IU68	Transmembrane channel-like protein 8	TMC8	S243
Q8IU68	Transmembrane channel-like protein 8	TMC8	S249
Q8IU68	Transmembrane channel-like protein 8	TMC8	Y238
Q8IUH3	RNA-binding protein 45	RBM45	S240
Q8IWY7	Tau-tubulin kinase 2	TTBK2	S853
Q8IWZ3	Ankyrin repeat and KH domain-containing protein 1	ANKHD1	S23
Q8IX90	Spindle and kinetochore-associated protein 3	SKA3	S145
Q8IXT1	DNA damage-induced apoptosis suppressor protein	DDIAS	S584
Q8IYT3	Coiled-coil domain-containing protein 170	CCDC170	S658
Q8IYT3	Coiled-coil domain-containing protein 170	CCDC170	S667
Q8IYT3	Coiled-coil domain-containing protein 170	CCDC170	T666
Q8IZD2	Histone-lysine N-methyltransferase 2E	KMT2E	S863
Q8IZQ1	WD repeat and FYVE domain-containing protein 3	WDFY3	S969
Q8N0Z3	Spindle and centriole-associated protein 1	SPICE1	S100
Q8N0Z3	Spindle and centriole-associated protein 1	SPICE1	S278
Q8N0Z3	Spindle and centriole-associated protein 1	SPICE1	S287
Q8N328	PiggyBac transposable element-derived protein 3	PGBD3	S484
Q8N328	PiggyBac transposable element-derived protein 3	PGBD3	S485
Q8N328	PiggyBac transposable element-derived protein 3	PGBD3	Y483
Q8N3C0	Activating signal cointegrator 1 complex subunit 3	ASCC3	S1820
Q8N3C0	Activating signal cointegrator 1 complex subunit 3	ASCC3	T1828
Q8N3C0	Activating signal cointegrator 1 complex subunit 3	ASCC3	Y1821
Q8N3L3	Beta-taxilin	TXLNB	S75
Q8N3L3	Beta-taxilin	TXLNB	T76
Q8N5U6	RING finger protein 10	RNF10	S806
Q8N5W9	Filamin-interacting protein FAM101B	FAM101B	S211
Q8N6V9	Testis-expressed sequence 9 protein	TEX9	S293
Q8N7G0	POU domain, class 5, transcription factor 2	POU5F2	S36
Q8N7G0	POU domain, class 5, transcription factor 2	POU5F2	T37
Q8N7R7	Cyclin-Y-like protein 1	CCNYL1	S14
Q8N7W2	BEN domain-containing protein 7	BEND7	S12
Q8N7W2	BEN domain-containing protein 7	BEND7	S14
Q8N9M5	Transmembrane protein 102	TMEM102	S216
Q8N9Z9	Lamin tail domain-containing protein 1	LMNTD1	S85
Q8NB66	Protein unc-13 homolog C	UNC13C	S1210
Q8NB66	Protein unc-13 homolog C	UNC13C	T1204
Q8NB66	Protein unc-13 homolog C	UNC13C	T1215
Q8ND82	Zinc finger protein 280C	ZNF280C	S114
Q8NDH2	Coiled-coil domain-containing protein 168	CCDC168	S236
Q8NDH2	Coiled-coil domain-containing protein 168	CCDC168	S237
Q8NDI1	EH domain-binding protein 1	EHBP1	S295
Q8NEE8	Tetratricopeptide repeat protein 16	TTC16	S683
Q8NEE8	Tetratricopeptide repeat protein 16	TTC16	S690
Q8NEM0	Microcephalin	MCPH1	S286
Q8NFM7	Interleukin-17 receptor D	IL17RD	S48
Q8NFM7	Interleukin-17 receptor D	IL17RD	T57
Q8NFM7	Interleukin-17 receptor D	IL17RD	Y54
Q8NFQ8	Torsin-1A-interacting protein 2	TOR1AIP2	S122
Q8NFY4	Semaphorin-6D	SEMA6D	S891
Q8NFY4	Semaphorin-6D	SEMA6D	T878
Q8NGX8	Olfactory receptor 6Y1	OR6Y1	S275
Q8NGX8	Olfactory receptor 6Y1	OR6Y1	Y271
Q8NGX8	Olfactory receptor 6Y1	OR6Y1	Y273
Q8TBF8	Protein FAM81A	FAM81A	S277
Q8TBM8	DnaJ homolog subfamily B member 14	DNAJB14	S319
Q8TBM8	DnaJ homolog subfamily B member 14	DNAJB14	T326
Q8TD19	Serine/threonine-protein kinase Nek9	NEK9	S22
Q8TD20	Solute carrier family 2, facilitated glucose transporter member 12	SLC2A12	S244
Q8TD26	Chromodomain-helicase-DNA-binding protein 6	CHD6	S458
Q8TD43	Transient receptor potential cation channel subfamily M member 4	TRPM4	S366
Q8TD43	Transient receptor potential cation channel subfamily M member 4	TRPM4	S370
Q8TD43	Transient receptor potential cation channel subfamily M member 4	TRPM4	T375
Q8TDY2	RB1-inducible coiled-coil protein 1	RB1CC1	S667
Q8TE82	SH3 domain and tetratricopeptide repeat-containing protein 1	SH3TC1	S1048
Q8TE82	SH3 domain and tetratricopeptide repeat-containing protein 1	SH3TC1	S1056
Q8TE82	SH3 domain and tetratricopeptide repeat-containing protein 1	SH3TC1	Y1052
Q8TER5	Rho guanine nucleotide exchange factor 40	ARHGEF40	S409
Q8TER5	Rho guanine nucleotide exchange factor 40	ARHGEF40	Y1016
Q8TF44	C2 calcium-dependent domain-containing protein 4C	C2CD4C	S58
Q8TF74	WAS/WASL-interacting protein family member 2	WIPF2	S272
Q8WTU0	Protein DDI1 homolog 1	DDI1	S18
Q8WTU0	Protein DDI1 homolog 1	DDI1	S22
Q8WTU0	Protein DDI1 homolog 1	DDI1	T16
Q8WU03	Glycine N-acyltransferase-like protein 2	GLYATL2	S7
Q8WU03	Glycine N-acyltransferase-like protein 2	GLYATL2	Y14
S5FZ81	PHD finger protein 10	PHF10	S297
S5FZ81	PHD finger protein 10	PHF10	S301
Q8WUT9	Solute carrier family 25 member 43	SLC25A43	S168
Q8WUT9	Solute carrier family 25 member 43	SLC25A43	S178
Q8WUT9	Solute carrier family 25 member 43	SLC25A43	S181
Q8WUT9	Solute carrier family 25 member 43	SLC25A43	T170
Q8WXH5	Suppressor of cytokine signaling 4	SOCS4	S109
Q8WXH5	Suppressor of cytokine signaling 4	SOCS4	S110
Q8WXI4	Acyl-coenzyme A thioesterase 11	ACOT11	S131
Q8WXI7	Mucin-16	MUC16	S1003
Q92576	PHD finger protein 3	PHF3	S407
Q92576	PHD finger protein 3	PHF3	S413
Q92610	Zinc finger protein 592	ZNF592	S936
Q92610	Zinc finger protein 592	ZNF592	S680
Q92614	Unconventional myosin-XVIIIa	MYO18A	S2031
Q92624	Amyloid protein-binding protein 2	APPBP2	S511
Q92624	Amyloid protein-binding protein 2	APPBP2	Y510
Q92624	Amyloid protein-binding protein 2	APPBP2	Y515
Q92889	DNA repair endonuclease XPF	ERCC4	S94
Q92889	DNA repair endonuclease XPF	ERCC4	S96
Q92922	SWI/SNF complex subunit SMARCC1	SMARCC1	S432
Q92922	SWI/SNF complex subunit SMARCC1	SMARCC1	T404
Q92935	Exostosin-like 1	EXTL1	S549
Q92935	Exostosin-like 1	EXTL1	T567
Q92953	Potassium voltage-gated channel subfamily B member 2	KCNB2	S803
Q92953	Potassium voltage-gated channel subfamily B member 2	KCNB2	Y544
Q96B18	Dapper homolog 3	DACT3	S186
Q96BN6	Protein FAM149B1	FAM149B1	S532
Q96CN4	EVI5-like protein	EVI5L	S52
Q96CN4	EVI5-like protein	EVI5L	S54
Q96CV9	Optineurin	OPTN	S212
Q96D09	G-protein coupled receptor-associated sorting protein 2	GPRASP2	S534
Q96DF8	Protein DGCR14	DGCR14	S384
Q96DT7	Zinc finger and BTB domain-containing protein 10	ZBTB10	S466
Q96IK5	Germ cell-less protein-like 1	GMCL1	S493
Q96JE7	Protein transport protein Sec16B	SEC16B	S621
Q96JE7	Protein transport protein Sec16B	SEC16B	S625
Q96JE7	Protein transport protein Sec16B	SEC16B	S635
Q96JE7	Protein transport protein Sec16B	SEC16B	Y629
Q96JE7	Protein transport protein Sec16B	SEC16B	Y633
Q96JH7	Deubiquitinating protein VCIP135	VCPIP1	S1147
Q96JH8	Ras-associating and dilute domain-containing protein	RADIL	S963
Q96KF2	Small nuclear protein PRAC1	PRAC1	S7
Q96M83	Coiled-coil domain-containing protein 7	CCDC7	S314
Q96MP5	Zinc finger SWIM domain-containing protein 3	ZSWIM3	S274
Q96N95	Zinc finger protein 396	ZNF396	S178
Q96N95	Zinc finger protein 396	ZNF396	S183
Q96NG3	Tetratricopeptide repeat protein 25	TTC25	S512
Q96NG3	Tetratricopeptide repeat protein 25	TTC25	Y514
Q96PE2	Rho guanine nucleotide exchange factor 17	ARHGEF17	S499
Q96PE2	Rho guanine nucleotide exchange factor 17	ARHGEF17	S145
Q96PX6	Coiled-coil domain-containing protein 85A	CCDC85A	S369
Q96Q15	Serine/threonine-protein kinase SMG1	SMG1	S2171
Q96Q15	Serine/threonine-protein kinase SMG1	SMG1	T2175
Q96QD5	DEP domain-containing protein 7	DEPDC7	S246
Q96QS6	Serine/threonine-protein kinase H2	PSKH2	S345
Q96RG2	PAS domain-containing serine/threonine-protein kinase	PASK	S115
Q96RG2	PAS domain-containing serine/threonine-protein kinase	PASK	S873
Q96RV3	Pecanex-like protein 1	PCNX	S1758
Q96RV3	Pecanex-like protein 1	PCNX	S147
Q96T17	MAP7 domain-containing protein 2	MAP7D2	S186
Q99618	Cell division cycle-associated protein 3	CDCA3	S225
Q99666	RANBP2-like and GRIP domain-containing protein 5/6	RGPD5	S1761
Q99741	Cell division control protein 6 homolog	CDC6	S123
Q99956	Dual specificity protein phosphatase 9	DUSP9	S343
Q9BPU6	Dihydropyrimidinase-related protein 5	DPYSL5	S532
Q9BQI7	PH and SEC7 domain-containing protein 2	PSD2	S277
Q9BRR0	Zinc finger protein with KRAB and SCAN domains 3	ZKSCAN3	S479
Q9BSE2	Transmembrane protein 79	TMEM79	S386
Q9BSE2	Transmembrane protein 79	TMEM79	Y388
Q9BTC0	Death-inducer obliterator 1	DIDO1	S1038
Q9BUL9	Ribonuclease P protein subunit p25	RPP25	S56
Q9BVM2	Protein DPCD	DPCD	S117
Q9BVM2	Protein DPCD	DPCD	Y116
Q9BWX5	Transcription factor GATA-5	GATA5	S313
Q9BXI3	Cytosolic 5'-nucleotidase 1A	NT5C1A	S45
Q9BXT5	Testis-expressed sequence 15 protein	TEX15	S2322
Q9BXT5	Testis-expressed sequence 15 protein	TEX15	S1473
Q9BXT5	Testis-expressed sequence 15 protein	TEX15	Y1475
Q9BZD4	Kinetochore protein Nuf2	NUF2	S312
Q9BZM4	NKG2D ligand 3	ULBP3	S55
Q9C0A1	Zinc finger homeobox protein 2	ZFHX2	S2073
Q9C0A1	Zinc finger homeobox protein 2	ZFHX2	S2074
Q9C0B2	Cilia- and flagella-associated protein 74	CFAP74	S1373
Q9C0G6	Dynein heavy chain 6, axonemal	DNAH6	S3592
Q9GZR1	Sentrin-specific protease 6	SENP6	S324
Q9GZR1	Sentrin-specific protease 6	SENP6	S326
Q9GZR1	Sentrin-specific protease 6	SENP6	S890
Q9H040	SprT-like domain-containing protein Spartan	SPRTN	S368
Q9H0F5	E3 ubiquitin-protein ligase RNF38	RNF38	S55
Q9H0W5	Coiled-coil domain-containing protein 8	CCDC8	S199
Q9H2J7	Sodium-dependent neutral amino acid transporter B(0)AT2	SLC6A15	S654
Q9H2J7	Sodium-dependent neutral amino acid transporter B(0)AT2	SLC6A15	T49
Q9H3Z4	DnaJ homolog subfamily C member 5	DNAJC5	S151
Q9H511	Kelch-like protein 31	KLHL31	S274
Q9H5U6	Zinc finger CCHC domain-containing protein 4	ZCCHC4	S496
Q9H5U6	Zinc finger CCHC domain-containing protein 4	ZCCHC4	T495
Q9H5U6	Zinc finger CCHC domain-containing protein 4	ZCCHC4	T498
Q9H5X1	MIP18 family protein FAM96A	FAM96A	S119
Q9H5X1	MIP18 family protein FAM96A	FAM96A	T125
Q9H5X1	MIP18 family protein FAM96A	FAM96A	Y117
Q9H649	Putative methyltransferase NSUN3	NSUN3	S88
Q9H649	Putative methyltransferase NSUN3	NSUN3	S94
Q9H649	Putative methyltransferase NSUN3	NSUN3	Y92
Q9H6S0	Probable ATP-dependent RNA helicase YTHDC2	YTHDC2	S416
Q9H6S0	Probable ATP-dependent RNA helicase YTHDC2	YTHDC2	Y415
Q9H8N7	Zinc finger protein 395	ZNF395	S451
Q9HBE1	POZ-, AT hook-, and zinc finger-containing protein 1	PATZ1	S132
Q9HCD6	Protein TANC2	TANC2	S1840
Q9HCI5	Melanoma-associated antigen E1	MAGEE1	S2
Q9HCI7	E3 ubiquitin-protein ligase MSL2	MSL2	S501
Q9HCM2	Plexin-A4	PLXNA4	S983
Q9HCM3	UPF0606 protein KIAA1549	KIAA1549	S1939
Q9HCS5	Band 4.1-like protein 4A	EPB41L4A	S368
Q9HCS7	Pre-mRNA-splicing factor SYF1	XAB2	S743
Q9HDC5	Junctophilin-1	JPH1	S500
Q9NPA3	Mid1-interacting protein 1	MID1IP1	S119
Q9NPI6	mRNA-decapping enzyme 1A	DCP1A	S420
Q9NQS3	Nectin-3	PVRL3	S522
Q9NQT8	Kinesin-like protein KIF13B;Kinesin-like protein	KIF13B	S609
Q9NQW1	Protein transport protein Sec31B	SEC31B	S707
Q9NQX4	Unconventional myosin-Vc	MYO5C	S825
Q9NQX4	Unconventional myosin-Vc	MYO5C	Y821
Q9NQX4	Unconventional myosin-Vc	MYO5C	Y827
Q9NR09	Baculoviral IAP repeat-containing protein 6	BIRC6	S2953
Q9NR61	Delta-like protein 4	DLL4	S397
Q9NR61	Delta-like protein 4	DLL4	T395
Q9NR61	Delta-like protein 4	DLL4	Y386
Q9NVN8	Guanine nucleotide-binding protein-like 3-like protein	GNL3L	S354
Q9NVN8	Guanine nucleotide-binding protein-like 3-like protein	GNL3L	T364
Q9NVN8	Guanine nucleotide-binding protein-like 3-like protein	GNL3L	Y351
Q9NVP1	ATP-dependent RNA helicase DDX18	DDX18	S105
Q9NW75	G patch domain-containing protein 2	GPATCH2	S359
Q9NW97	Transmembrane protein 51	TMEM51	S229
Q9NWL6	Asparagine synthetase domain-containing protein 1	ASNSD1	S631
Q9NY27	Serine/threonine-protein phosphatase 4 regulatory subunit 2	PPP4R2	S220
Q9NYQ6	Cadherin EGF LAG seven-pass G-type receptor 1	CELSR1	S2417
Q9NYQ8	Protocadherin Fat 2	FAT2	S2588
Q9NYQ8	Protocadherin Fat 2	FAT2	T2576
Q9NZB8	Molybdenum cofactor biosynthesis protein 1;Cyclic pyranopterin monophosphate synthase;Cyclic pyranopterin monophosphate synthase accessory protein	MOCS1	S455
Q9NZB8	Molybdenum cofactor biosynthesis protein 1;Cyclic pyranopterin monophosphate synthase;Cyclic pyranopterin monophosphate synthase accessory protein	MOCS1	S459
Q9NZI8	Insulin-like growth factor 2 mRNA-binding protein 1	IGF2BP1	S314
Q9NZJ4	Sacsin	SACS	S283
Q9P1Y5	Calmodulin-regulated spectrin-associated protein 3	CAMSAP3	S350
Q9P206	Uncharacterized protein KIAA1522	KIAA1522	S508
Q9P2D1	Chromodomain-helicase-DNA-binding protein 7	CHD7	S722
Q9P2D1	Chromodomain-helicase-DNA-binding protein 7	CHD7	S2490
Q9P2G4	Microtubule-associated protein 10	MAP10	S696
Q9P2G4	Microtubule-associated protein 10	MAP10	Y692
Q9P2Q2	FERM domain-containing protein 4A	FRMD4A	S797
Q9P2Q2	FERM domain-containing protein 4A	FRMD4A	Y840
Q9P2R3	Rabankyrin-5	ANKFY1	S203
Q9P2R3	Rabankyrin-5	ANKFY1	S204
Q9P2R3	Rabankyrin-5	ANKFY1	S216
Q9UBB4	Ataxin-10	ATXN10	S96
Q9UBG0	C-type mannose receptor 2	MRC2	S1455
Q9UBG0	C-type mannose receptor 2	MRC2	S1155
Q9UBG0	C-type mannose receptor 2	MRC2	S1159
Q9UBG0	C-type mannose receptor 2	MRC2	T1463
Q9UBG3	Cornulin	CRNN	S466
Q9UBG3	Cornulin	CRNN	S475
Q9UBJ2	ATP-binding cassette sub-family D member 2	ABCD2	S705
Q9UBY0	Sodium/hydrogen exchanger 2	SLC9A2	S663
Q9UGU0	Transcription factor 20	TCF20	S1061
Q9UGU0	Transcription factor 20	TCF20	T1067
Q9UGU0	Transcription factor 20	TCF20	Y1063
Q9UHF7	Zinc finger transcription factor Trps1	TRPS1	S388
Q9UHW9	Solute carrier family 12 member 6	SLC12A6	S37
Q9UJA5	tRNA (adenine(58)-N(1))-methyltransferase non-catalytic subunit TRM6	TRMT6	S288
Q9UJF2	Ras GTPase-activating protein nGAP	RASAL2	S950
Q9UKK3	Poly [ADP-ribose] polymerase 4	PARP4	S405
Q9UKX3	Myosin-13	MYH13	S1898
Q9UKX3	Myosin-13	MYH13	Y1882
Q9UKZ4	Teneurin-1;Ten-1 intracellular domain;Teneurin C-terminal-associated peptide	TENM1	S105
Q9ULD5	Zinc finger protein 777	ZNF777	S45
Q9ULI1	NACHT and WD repeat domain-containing protein 2	NWD2	S1269
Q9ULI1	NACHT and WD repeat domain-containing protein 2	NWD2	S1276
Q9ULW0	Targeting protein for Xklp2	TPX2	S385
Q9ULW8	Protein-arginine deiminase type-3	PADI3	S527
Q9ULW8	Protein-arginine deiminase type-3	PADI3	T525
Q9UMZ2	Synergin gamma	SYNRG	S578
Q9UN81	LINE-1 retrotransposable element ORF1 protein	L1RE1	S27
Q9UPY3	Endoribonuclease Dicer	DICER1	S995
Q9UPZ3	Hermansky-Pudlak syndrome 5 protein	HPS5	S39
Q9UPZ3	Hermansky-Pudlak syndrome 5 protein	HPS5	S43
Q9Y2D8	Afadin- and alpha-actinin-binding protein	SSX2IP	S29
Q9Y2H6	Fibronectin type-III domain-containing protein 3A	FNDC3A	S695
Q9Y2H6	Fibronectin type-III domain-containing protein 3A	FNDC3A	S702
Q9Y2K3	Myosin-15	MYH15	S1820
Q9Y2S2	Lambda-crystallin homolog	CRYL1	S27
Q9Y2Y8	Proteoglycan 3	PRG3	S129
Q9Y2Y8	Proteoglycan 3	PRG3	T120
Q9Y2Z0	Suppressor of G2 allele of SKP1 homolog	SUGT1	S202
Q9Y644	Beta-1,3-N-acetylglucosaminyltransferase radical fringe	RFNG	S128
Q9Y644	Beta-1,3-N-acetylglucosaminyltransferase radical fringe	RFNG	Y131
Q9Y6A2	Cholesterol 24-hydroxylase	CYP46A1	S431
Q9Y6A2	Cholesterol 24-hydroxylase	CYP46A1	S436
Q9Y6A2	Cholesterol 24-hydroxylase	CYP46A1	T426
Q9Y6A2	Cholesterol 24-hydroxylase	CYP46A1	Y427
Q9Y6N6	Laminin subunit gamma-3	LAMC3	S1082
Q9Y6V7	Probable ATP-dependent RNA helicase DDX49	DDX49	S474
Q9Y6Y1	Calmodulin-binding transcription activator 1	CAMTA1	S106
Q9Y6Y1	Calmodulin-binding transcription activator 1	CAMTA1	T100
Q9Y6Y1	Calmodulin-binding transcription activator 1	CAMTA1	Y110
A1KXE4	Myelin-associated neurite-outgrowth inhibitor	FAM168B	T185
A6NKP2	Putative short-chain dehydrogenase/reductase family 42E member 2	SDR42E2	T187
A6NKP2	Putative short-chain dehydrogenase/reductase family 42E member 2	SDR42E2	T200
O14802	DNA-directed RNA polymerase III subunit RPC1	POLR3A	T983
O14802	DNA-directed RNA polymerase III subunit RPC1	POLR3A	T995
O14966	Ras-related protein Rab-7L1	RAB29	T74
O15091	Mitochondrial ribonuclease P protein 3	KIAA0391	T116
O15229	Kynurenine 3-monooxygenase	KMO	T220
O15234	Protein CASC3	CASC3	T127
O15457	MutS protein homolog 4	MSH4	T342
O43299	AP-5 complex subunit zeta-1	AP5Z1	T663
O43310	CBP80/20-dependent translation initiation factor	CTIF	T123
O43379	WD repeat-containing protein 62	WDR62	T1068
O60762	Dolichol-phosphate mannosyltransferase subunit 1	DPM1	T172
O75398	Deformed epidermal autoregulatory factor 1 homolog	DEAF1	T434
O75398	Deformed epidermal autoregulatory factor 1 homolog	DEAF1	T311
O94782	Ubiquitin carboxyl-terminal hydrolase 1	USP1	T554
O94782	Ubiquitin carboxyl-terminal hydrolase 1	USP1	T558
O94885	SAM and SH3 domain-containing protein 1	SASH1	T1030
O95149	Snurportin-1	SNUPN	T71
O95263	High affinity cAMP-specific and IBMX-insensitive 3',5'-cyclic phosphodiesterase 8B	PDE8B	T730
O95487	Protein transport protein Sec24B	SEC24B	T783
O95613	Pericentrin	PCNT	T539
O95613	Pericentrin	PCNT	T2154
O95613	Pericentrin	PCNT	Y534
O96005	Cleft lip and palate transmembrane protein 1	CLPTM1	T26
P00740	Coagulation factor IX;Coagulation factor IXa light chain;Coagulation factor IXa heavy chain	F9	T445
P00740	Coagulation factor IX;Coagulation factor IXa light chain;Coagulation factor IXa heavy chain	F9	Y441
P00740	Coagulation factor IX;Coagulation factor IXa light chain;Coagulation factor IXa heavy chain	F9	Y450
P01024	Complement C3;Complement C3 beta chain;C3-beta-c;Complement C3 alpha chain;C3a anaphylatoxin;Acylation stimulating protein;Complement C3b alpha' chain;Complement C3c alpha' chain fragment 1;Complement C3dg fragment;Complement C3g fragment;Complement C3d fragment;Complement C3f fragment;Complement C3c alpha' chain fragment 2	C3	T491
P01024	Complement C3;Complement C3 beta chain;C3-beta-c;Complement C3 alpha chain;C3a anaphylatoxin;Acylation stimulating protein;Complement C3b alpha' chain;Complement C3c alpha' chain fragment 1;Complement C3dg fragment;Complement C3g fragment;Complement C3d fragment;Complement C3f fragment;Complement C3c alpha' chain fragment 2	C3	T887
P08910	Abhydrolase domain-containing protein 2	ABHD2	T145
P08910	Abhydrolase domain-containing protein 2	ABHD2	Y149
P08910	Abhydrolase domain-containing protein 2	ABHD2	Y155
P09661	U2 small nuclear ribonucleoprotein A'	SNRPA1	T16
P0DN79	Cystathionine beta-synthase	CBS	T87
P12270	Nucleoprotein TPR	TPR	T472
P12270	Nucleoprotein TPR	TPR	T903
P12270	Nucleoprotein TPR	TPR	T1275
P15813	Antigen-presenting glycoprotein CD1d	CD1D	T96
P22680	Cholesterol 7-alpha-monooxygenase	CYP7A1	T128
P24298	Alanine aminotransferase 1	GPT	T246
P24298	Alanine aminotransferase 1	GPT	T251
P31939	Bifunctional purine biosynthesis protein PURH;Phosphoribosylaminoimidazolecarboxamide formyltransferase;IMP cyclohydrolase	ATIC	T221
P33527	Multidrug resistance-associated protein 1	ABCC1	T1270
P36915	Guanine nucleotide-binding protein-like 1	GNL1	T586
P46013	Antigen KI-67	MKI67	T861
P47712	Cytosolic phospholipase A2;Phospholipase A2;Lysophospholipase	PLA2G4A	T41
P47712	Cytosolic phospholipase A2;Phospholipase A2;Lysophospholipase	PLA2G4A	Y45
P47898	5-hydroxytryptamine receptor 5A	HTR5A	T20
P50591	Tumor necrosis factor ligand superfamily member 10	TNFSF10	T200
P51003	Poly(A) polymerase alpha	PAPOLA	T719
P51571	Translocon-associated protein subunit delta	SSR4	T78
P51812	Ribosomal protein S6 kinase alpha-3	RPS6KA3	T738
P68133	Actin, alpha skeletal muscle	ACTA1	T353
P84074	Neuron-specific calcium-binding protein hippocalcin	HPCA	T158
Q07890	Son of sevenless homolog 2	SOS2	T1330
Q08881	Tyrosine-protein kinase ITK/TSK	ITK	T110
Q09MP3	RAD51-associated protein 2	RAD51AP2	T196
Q12996	Cleavage stimulation factor subunit 3	CSTF3	T242
Q13523	Serine/threonine-protein kinase PRP4 homolog	PRPF4B	T952
Q13576	Ras GTPase-activating-like protein IQGAP2	IQGAP2	T959
Q13576	Ras GTPase-activating-like protein IQGAP2	IQGAP2	T963
Q14207	Protein NPAT	NPAT	T1153
Q14515	SPARC-like protein 1	SPARCL1	T138
Q14DG7	Transmembrane protein 132B	TMEM132B	T267
Q14DG7	Transmembrane protein 132B	TMEM132B	Y265
Q15398	Disks large-associated protein 5	DLGAP5	T342
Q15699	ALX homeobox protein 1	ALX1	T68
Q4G0J3	La-related protein 7	LARP7	T17
Q5FWF5	N-acetyltransferase ESCO1	ESCO1	T272
Q5M9N0	Coiled-coil domain-containing protein 158	CCDC158	T150
Q5SZK8	FRAS1-related extracellular matrix protein 2	FREM2	T2338
Q5U649	Uncharacterized protein C12orf60	C12orf60	T204
Q6N075	Molybdate-anion transporter	MFSD5	T442
Q6ZR37	Pleckstrin homology domain-containing family G member 7	PLEKHG7	T253
Q6ZR37	Pleckstrin homology domain-containing family G member 7	PLEKHG7	T255
Q6ZT07	TBC1 domain family member 9	TBC1D9	T460
Q6ZT07	TBC1 domain family member 9	TBC1D9	T465
Q6ZT07	TBC1 domain family member 9	TBC1D9	Y467
Q6ZUJ8	Phosphoinositide 3-kinase adapter protein 1	PIK3AP1	T173
Q7Z2Z2	Elongation factor Tu GTP-binding domain-containing protein 1	EFTUD1	T789
Q7Z5Y7	BTB/POZ domain-containing protein KCTD20	KCTD20	T307
Q7Z5Y7	BTB/POZ domain-containing protein KCTD20	KCTD20	Y298
Q7Z6Z7	E3 ubiquitin-protein ligase HUWE1	HUWE1	T3242
Q86U90	YrdC domain-containing protein, mitochondrial	YRDC	T87
Q86U90	YrdC domain-containing protein, mitochondrial	YRDC	T89
Q86U90	YrdC domain-containing protein, mitochondrial	YRDC	Y91
Q8IWJ2	GRIP and coiled-coil domain-containing protein 2	GCC2	T111
Q8N122	Regulatory-associated protein of mTOR	RPTOR	T22
Q8N3F8	MICAL-like protein 1	MICALL1	T416
Q8N3J3	Uncharacterized protein C17orf53	C17orf53	T426
Q8N6N3	UPF0690 protein C1orf52	C1orf52	T166
Q8N7M0	Tctex1 domain-containing protein 1	TCTEX1D1	T61
Q8N7M0	Tctex1 domain-containing protein 1	TCTEX1D1	T67
Q8ND04	Protein SMG8	SMG8	T444
Q8ND04	Protein SMG8	SMG8	Y445
Q8NEF9	Serum response factor-binding protein 1	SRFBP1	T6
Q8NEY1	Neuron navigator 1	NAV1	T540
Q8NG27	E3 ubiquitin-protein ligase Praja-1	PJA1	T385
Q8NG31	Protein CASC5	CASC5	T1440
Q8NG31	Protein CASC5	CASC5	Y504
Q8TAQ2	SWI/SNF complex subunit SMARCC2	SMARCC2	T552
Q8TDY8	Immunoglobulin superfamily DCC subclass member 4	IGDCC4	T584
Q8TEK3	Histone-lysine N-methyltransferase, H3 lysine-79 specific	DOT1L	T385
Q92692	Nectin-2	PVRL2	T178
Q92692	Nectin-2	PVRL2	T179
Q92692	Nectin-2	PVRL2	Y406
Q92729	Receptor-type tyrosine-protein phosphatase U	PTPRU	T1425
Q92729	Receptor-type tyrosine-protein phosphatase U	PTPRU	Y1439
Q969F2	Protein naked cuticle homolog 2	NKD2	T129
Q969F2	Protein naked cuticle homolog 2	NKD2	Y131
Q96D71	RalBP1-associated Eps domain-containing protein 1	REPS1	T448
Q96DA6	Mitochondrial import inner membrane translocase subunit TIM14	DNAJC19	T72
Q96F44	E3 ubiquitin-protein ligase TRIM11	TRIM11	T163
Q96K76	Ubiquitin carboxyl-terminal hydrolase 47	USP47	T323
Q96K76	Ubiquitin carboxyl-terminal hydrolase 47	USP47	Y324
Q96L46	Calpain small subunit 2	CAPNS2	T98
Q96L91	E1A-binding protein p400	EP400	T2689
Q96QB1	Rho GTPase-activating protein 7	DLC1	T1163
Q96QB1	Rho GTPase-activating protein 7	DLC1	Y1176
Q96QB1	Rho GTPase-activating protein 7	DLC1	Y1153
Q99569	Plakophilin-4	PKP4	T344
Q99569	Plakophilin-4	PKP4	Y126
Q99814	Endothelial PAS domain-containing protein 1	EPAS1	T766
Q9BPW4	Apolipoprotein L4	APOL4	T277
Q9BPW4	Apolipoprotein L4	APOL4	T282
Q9BVJ6	U3 small nucleolar RNA-associated protein 14 homolog A	UTP14A	T567
Q9BXX2	Ankyrin repeat domain-containing protein 30B	ANKRD30B	T1152
Q9BY12	S phase cyclin A-associated protein in the endoplasmic reticulum	SCAPER	T62
Q9BY12	S phase cyclin A-associated protein in the endoplasmic reticulum	SCAPER	T63
Q9BYV9	Transcription regulator protein BACH2	BACH2	T827
Q9C0D5	Protein TANC1	TANC1	T910
Q9C0D5	Protein TANC1	TANC1	T1707
Q9C0D5	Protein TANC1	TANC1	T1713
Q9H2P0	Activity-dependent neuroprotector homeobox protein	ADNP	T938
Q9H3C7	Gametogenetin-binding protein 2	GGNBP2	T563
Q9H706	GRB2-associated and regulator of MAPK protein	GAREM	T235
Q9H792	Pseudopodium-enriched atypical kinase 1	PEAK1	T664
Q9H7T0	Cation channel sperm-associated protein subunit beta	CATSPERB	T595
Q9H7T0	Cation channel sperm-associated protein subunit beta	CATSPERB	T596
Q9H8M2	Bromodomain-containing protein 9	BRD9	T579
Q9H8M2	Bromodomain-containing protein 9	BRD9	Y583
Q9H8M2	Bromodomain-containing protein 9	BRD9	Y19
Q9HAW4	Claspin	CLSPN	T217
Q9NRC6	Spectrin beta chain, non-erythrocytic 5	SPTBN5	T2037
Q9NRL2	Bromodomain adjacent to zinc finger domain protein 1A	BAZ1A	T771
Q9NSE4	Isoleucine--tRNA ligase, mitochondrial	IARS2	T83
Q9NXL2	Rho guanine nucleotide exchange factor 38	ARHGEF38	T421
Q9NXL9	DNA helicase MCM9	MCM9	T673
Q9NXL9	DNA helicase MCM9	MCM9	T879
Q9NZN5	Rho guanine nucleotide exchange factor 12	ARHGEF12	T189
Q9UHB7	AF4/FMR2 family member 4	AFF4	T296
Q9UKA4	A-kinase anchor protein 11	AKAP11	T270
Q9UKX7	Nuclear pore complex protein Nup50	NUP50	T319
Q9UQ52	Contactin-6	CNTN6	T218
Q9Y232	Chromodomain Y-like protein	CDYL	T25
Q9Y232	Chromodomain Y-like protein	CDYL	Y21
Q9Y252	E3 ubiquitin-protein ligase RNF6	RNF6	T396
Q9Y252	E3 ubiquitin-protein ligase RNF6	RNF6	T398
Q9Y277	Voltage-dependent anion-selective channel protein 3	VDAC3	T248
A2AJT9	Uncharacterized protein CXorf23	CXorf23	Y122
O00472	RNA polymerase II elongation factor ELL2	ELL2	Y586
O00472	RNA polymerase II elongation factor ELL2	ELL2	Y597
O00567	Nucleolar protein 56	NOP56	Y408
O14497	AT-rich interactive domain-containing protein 1A	ARID1A	Y1211
O15085	Rho guanine nucleotide exchange factor 11	ARHGEF11	Y200
O15360	Fanconi anemia group A protein	FANCA	Y531
O43304	SEC14-like protein 5	SEC14L5	Y230
O43805	Sjoegren syndrome nuclear autoantigen 1	SSNA1	Y82
O60741	Potassium/sodium hyperpolarization-activated cyclic nucleotide-gated channel 1	HCN1	Y91
O94806	Serine/threonine-protein kinase D3	PRKD3	Y232
O95405	Zinc finger FYVE domain-containing protein 9	ZFYVE9	Y287
O95456	Proteasome assembly chaperone 1	PSMG1	Y287
O95835	Serine/threonine-protein kinase LATS1	LATS1	Y573
P04899	Guanine nucleotide-binding protein G(i) subunit alpha-2	GNAI2	Y297
P07814	Bifunctional glutamate/proline--tRNA ligase;Glutamate--tRNA ligase;Proline--tRNA ligase	EPRS	Y1130
P11182	Lipoamide acyltransferase component of branched-chain alpha-keto acid dehydrogenase complex, mitochondrial	DBT	Y470
P12036	Neurofilament heavy polypeptide	NEFH	Y229
P17509	Homeobox protein Hox-B6	HOXB6	Y74
P30711	Glutathione S-transferase theta-1	GSTT1	Y73
P31260	Homeobox protein Hox-A10	HOXA10	Y172
P42684	Abelson tyrosine-protein kinase 2	ABL2	Y80
P46821	Microtubule-associated protein 1B;MAP1B heavy chain;MAP1 light chain LC1	MAP1B	Y1034
P46821	Microtubule-associated protein 1B;MAP1B heavy chain;MAP1 light chain LC1	MAP1B	Y2066
P51587	Breast cancer type 2 susceptibility protein	BRCA2	Y930
P63151	Serine/threonine-protein phosphatase 2A 55 kDa regulatory subunit B alpha isoform	PPP2R2A	Y143
P98174	FYVE, RhoGEF and PH domain-containing protein 1	FGD1	Y575
Q02410	Amyloid beta A4 precursor protein-binding family A member 1	APBA1	Y258
Q08AD1	Calmodulin-regulated spectrin-associated protein 2	CAMSAP2	Y825
Q08AD1	Calmodulin-regulated spectrin-associated protein 2	CAMSAP2	Y661
Q0VDD8	Dynein heavy chain 14, axonemal	DNAH14	Y212
Q12874	Splicing factor 3A subunit 3	SF3A3	Y50
Q12934	Filensin	BFSP1	Y479
Q13444	Disintegrin and metalloproteinase domain-containing protein 15	ADAM15	Y862
Q14680	Maternal embryonic leucine zipper kinase	MELK	Y374
Q14CN2	Calcium-activated chloride channel regulator 4;Calcium-activated chloride channel regulator 4, 110 kDa form;Calcium-activated chloride channel regulator 4, 30 kDa form	CLCA4	Y90
Q14CS0	UBX domain-containing protein 2B	UBXN2B	Y205
Q14CS0	UBX domain-containing protein 2B	UBXN2B	Y134
Q15025	TNFAIP3-interacting protein 1	TNIP1	Y10
Q15042	Rab3 GTPase-activating protein catalytic subunit	RAB3GAP1	Y545
Q15417	Calponin-3	CNN3	Y329
Q2M3G0	ATP-binding cassette sub-family B member 5	ABCB5	Y14
Q2Y0W8	Electroneutral sodium bicarbonate exchanger 1	SLC4A8	Y651
Q4VC44	FLYWCH-type zinc finger-containing protein 1	FLYWCH1	Y703
Q5BKX5	UPF0692 protein C19orf54	C19orf54	Y326
Q5JSH3	WD repeat-containing protein 44	WDR44	Y44
Q5T481	RNA-binding protein 20	RBM20	Y1123
Q5TCQ9	Membrane-associated guanylate kinase, WW and PDZ domain-containing protein 3	MAGI3	Y733
Q5TCQ9	Membrane-associated guanylate kinase, WW and PDZ domain-containing protein 3	MAGI3	Y285
Q5VT97	Rho GTPase-activating protein SYDE2	SYDE2	Y1112
Q5VV42	Threonylcarbamoyladenosine tRNA methylthiotransferase	CDKAL1	Y498
Q68CZ6	HAUS augmin-like complex subunit 3	HAUS3	Y452
Q68DQ2	Very large A-kinase anchor protein	CRYBG3	Y1401
Q69YQ0	Cytospin-A	SPECC1L	Y908
Q6IEG0	U11/U12 small nuclear ribonucleoprotein 48 kDa protein	SNRNP48	Y138
Q6IWH7	Anoctamin-7	ANO7	Y329
Q6P5Z2	Serine/threonine-protein kinase N3	PKN3	Y517
Q6S5H5	POTE ankyrin domain family member G	POTEG	Y344
Q6S5H5	POTE ankyrin domain family member G	POTEG	Y360
Q6UXX5	Inter-alpha-trypsin inhibitor heavy chain H6	ITIH6	Y453
Q6W2J9	BCL-6 corepressor	BCOR	Y805
Q6ZNL6	FYVE, RhoGEF and PH domain-containing protein 5	FGD5	Y1369
Q70EK8	Inactive ubiquitin carboxyl-terminal hydrolase 53	USP53	Y642
Q7RTP6	Protein-methionine sulfoxide oxidase MICAL3	MICAL3	Y1819
Q7Z3C6	Autophagy-related protein 9A	ATG9A	Y762
Q86UE8	Serine/threonine-protein kinase tousled-like 2	TLK2	Y129
Q8IYH5	ZZ-type zinc finger-containing protein 3	ZZZ3	Y261
Q8IZN3	Probable palmitoyltransferase ZDHHC14	ZDHHC14	Y14
Q8IZV5	Retinol dehydrogenase 10	RDH10	Y126
Q8N1G0	Zinc finger protein 687	ZNF687	Y514
Q8N3R9	MAGUK p55 subfamily member 5	MPP5	Y117
Q8N565	Melanoregulin	MREG	Y71
Q8N5F7	NF-kappa-B-activating protein	NKAP	Y309
Q8N720	Zinc finger protein 655	ZNF655	Y363
Q8N7X1	RNA-binding motif protein, X-linked-like-3	RBMXL3	Y943
Q8N7X1	RNA-binding motif protein, X-linked-like-3	RBMXL3	Y949
Q8N944	APC membrane recruitment protein 3	AMER3	Y62
Q8NEU8	DCC-interacting protein 13-beta	APPL2	Y378
Q8NEV4	Myosin-IIIa	MYO3A	Y838
Q8NEZ4	Histone-lysine N-methyltransferase 2C	KMT2C	Y516
Q8TAM1	Bardet-Biedl syndrome 10 protein	BBS10	Y448
Q8TCU6	Phosphatidylinositol 3,4,5-trisphosphate-dependent Rac exchanger 1 protein	PREX1	Y501
Q8TDD1	ATP-dependent RNA helicase DDX54	DDX54	Y681
Q8TEV9	Smith-Magenis syndrome chromosomal region candidate gene 8 protein	SMCR8	Y225
Q8WUA4	General transcription factor 3C polypeptide 2	GTF3C2	Y762
Q93009	Ubiquitin carboxyl-terminal hydrolase 7;Ubiquitin carboxyl-terminal hydrolase	USP7	Y878
Q96DT6	Cysteine protease ATG4C	ATG4C	Y426
Q96HW7	Integrator complex subunit 4	INTS4	Y343
Q96J94	Piwi-like protein 1	PIWIL1	Y32
Q96M89	Coiled-coil domain-containing protein 138	CCDC138	Y56
Q96QE2	Proton myo-inositol cotransporter	SLC2A13	Y629
Q96S90	LysM and putative peptidoglycan-binding domain-containing protein 1	LYSMD1	Y24
Q96T25	Zinc finger protein ZIC 5	ZIC5	Y297
Q96T58	Msx2-interacting protein	SPEN	Y610
Q9BQ67	Glutamate-rich WD repeat-containing protein 1	GRWD1	Y33
Q9BS86	Zona pellucida-binding protein 1	ZPBP	Y345
Q9BTE3	Mini-chromosome maintenance complex-binding protein	MCMBP	Y244
Q9BV73	Centrosome-associated protein CEP250	CEP250	Y302
Q9BVC5	Ashwin	C2orf49	Y53
Q9BVG4	Protein PBDC1	PBDC1	Y159
Q9BYG4	Partitioning defective 6 homolog gamma	PARD6G	Y14
Q9H013	Disintegrin and metalloproteinase domain-containing protein 19	ADAM19	Y243
Q9H0G5	Nuclear speckle splicing regulatory protein 1	NSRP1	Y8
Q9H1K0	Rabenosyn-5	RBSN	Y117
Q9H1K0	Rabenosyn-5	RBSN	Y571
Q9H1Z4	WD repeat-containing protein 13	WDR13	Y117
Q9NRR5	Ubiquilin-4	UBQLN4	Y286
Q9NYL2	Mitogen-activated protein kinase kinase kinase MLT	ZAK	Y715
Q9NYV4	Cyclin-dependent kinase 12	CDK12	Y1440
Q9P032	NADH dehydrogenase [ubiquinone] 1 alpha subcomplex assembly factor 4	NDUFAF4	Y47
Q9P2D6	Protein FAM135A	FAM135A	Y744
Q9P2F8	Signal-induced proliferation-associated 1-like protein 2	SIPA1L2	Y139
Q9UBQ6	Exostosin-like 2;Processed exostosin-like 2	EXTL2	Y323
Q9UF56	F-box/LRR-repeat protein 17	FBXL17	Y91
Q9UF56	F-box/LRR-repeat protein 17	FBXL17	Y104
Q9UIQ6	Leucyl-cystinyl aminopeptidase;Leucyl-cystinyl aminopeptidase, pregnancy serum form	LNPEP	Y325
Q9UJD0	Regulating synaptic membrane exocytosis protein 3	RIMS3	Y198
Q9UJY4	ADP-ribosylation factor-binding protein GGA2	GGA2	Y252
Q9ULD6	Protein inturned	INTU	Y786
Q9ULJ8	Neurabin-1	PPP1R9A	Y904
Q9ULM0	Pleckstrin homology domain-containing family H member 1	PLEKHH1	Y426
Q9UP95	Solute carrier family 12 member 4	SLC12A4	Y966
Q9UQR1	Zinc finger protein 148	ZNF148	Y651
Q9Y2M0	Fanconi-associated nuclease 1	FAN1	Y822
Q9Y4B5	Microtubule cross-linking factor 1	MTCL1	Y544
Q9Y4P8	WD repeat domain phosphoinositide-interacting protein 2	WIPI2	Y400
Q9Y5Z0	Beta-secretase 2	BACE2	Y149
A0A024R571	EH domain-containing protein 1	EHD1	S470
A0A087WV90	Dystrophin	DMD	S3547
A0A087WV90	Dystrophin	DMD	S3485
A0A075B6Q2	Formin-binding protein 1-like	FNBP1L	S335
A0A075B6Q2	Formin-binding protein 1-like	FNBP1L	S347
A0A075B6Q2	Formin-binding protein 1-like	FNBP1L	S141
A0A075B6Q2	Formin-binding protein 1-like	FNBP1L	Y137
A0A075B6Q3	BCL-6 corepressor-like protein 1	BCORL1	S96
A0A075B6Q3	BCL-6 corepressor-like protein 1	BCORL1	S213
A0A075B6Q3	BCL-6 corepressor-like protein 1	BCORL1	S199
A0A075B6Q3	BCL-6 corepressor-like protein 1	BCORL1	T914
A0A075B6T1	Activating molecule in BECN1-regulated autophagy protein 1	AMBRA1	S549
A0A075B730	Epiplakin	EPPK1	S2693
F8WBW8	BAH and coiled-coil domain-containing protein 1	BAHCC1	S2243
F8WBW8	BAH and coiled-coil domain-containing protein 1	BAHCC1	S1110
A0A075B754	ATPase family AAA domain-containing protein 5	ATAD5	S816
A0A087WXA6	GRIP1-associated protein 1	GRIPAP1	S234
A0A087WXA6	GRIP1-associated protein 1	GRIPAP1	S236
A0A087WXA6	GRIP1-associated protein 1	GRIPAP1	S245
A0A087WY75	Nuclear envelope pore membrane protein POM 121C	POM121C	S128
A0A087WY75	Nuclear envelope pore membrane protein POM 121C	POM121C	S131
A0A087WSV0	Bcl-2-like protein 12	BCL2L12	S189
A0A087WSV0	Bcl-2-like protein 12	BCL2L12	S29
A0A087WSV0	Bcl-2-like protein 12	BCL2L12	S37
A0A087WSV0	Bcl-2-like protein 12	BCL2L12	S158
A0A087WSV0	Bcl-2-like protein 12	BCL2L12	T33
A0A087WSX5	Zinc finger protein 628	ZNF628	S339
A0A087WSX5	Zinc finger protein 628	ZNF628	S235
D6RHE0	cAMP-specific 3',5'-cyclic phosphodiesterase 4D	PDE4D	S60
B7WPH3	Cat eye syndrome critical region protein 2	CECR2	S11
B7WPH3	Cat eye syndrome critical region protein 2	CECR2	S16
B7WPH3	Cat eye syndrome critical region protein 2	CECR2	S18
B7WPH3	Cat eye syndrome critical region protein 2	CECR2	S1122
B7WPH3	Cat eye syndrome critical region protein 2	CECR2	T363
A0A087WT35		PIP4K2B	S11
A0A0D9SF51	Phosphoinositide phospholipase C;1-phosphatidylinositol 4,5-bisphosphate phosphodiesterase beta-1	PLCB1	S353
A0A0D9SF51	Phosphoinositide phospholipase C;1-phosphatidylinositol 4,5-bisphosphate phosphodiesterase beta-1	PLCB1	Y715
A0A087X0U3	Amino acid transporter;Excitatory amino acid transporter 1	SLC1A3	S400
A0A087X0U3	Amino acid transporter;Excitatory amino acid transporter 1	SLC1A3	Y411
A0A087WT96	E3 ubiquitin-protein ligase ARIH1	ARIH1	S74
H7C2L8	Translation initiation factor eIF-2B subunit delta	EIF2B4	S50
A0A087WTB8	Ubiquitin carboxyl-terminal hydrolase;Ubiquitin carboxyl-terminal hydrolase isozyme L3	UCHL3	S94
A0A087WTB8	Ubiquitin carboxyl-terminal hydrolase;Ubiquitin carboxyl-terminal hydrolase isozyme L3	UCHL3	S125
A0A087WTD0	Nitrogen permease regulator 3-like protein	NPRL3	S136
A0A087WTF0	Protein tyrosine phosphatase domain-containing protein 1	PTPDC1	S492
A0A0D9SF98	Neural cell adhesion molecule 1	NCAM1	S283
A0A087WX12	Centrosomal protein kizuna	KIZ	S112
A0A087WX12	Centrosomal protein kizuna	KIZ	S116
A0A087WTL4	Bcl-2-like protein 13	BCL2L13	S396
A0A087WTL4	Bcl-2-like protein 13	BCL2L13	S402
A0A087WTM5	E3 ubiquitin-protein ligase RNF34	RNF34	S62
A0A087WTT1	Polyadenylate-binding protein;Polyadenylate-binding protein 1	PABPC1	S290
A0A087X0S7	Leucine-rich repeat-containing protein 41	LRRC41	S259
A0A087X0S7	Leucine-rich repeat-containing protein 41	LRRC41	S335
A0A087X0S7	Leucine-rich repeat-containing protein 41	LRRC41	T305
A0A087WTU3	Testis-expressed sequence 264 protein	TEX264	S174
A0A087WTU9	Alstrom syndrome protein 1	ALMS1	S2920
A0A087WTU9	Alstrom syndrome protein 1	ALMS1	S2662
A0A087WTU9	Alstrom syndrome protein 1	ALMS1	S2588
A0A087WTU9	Alstrom syndrome protein 1	ALMS1	Y3226
A0A087WTU9	Alstrom syndrome protein 1	ALMS1	Y4081
A0A087WTU9	Alstrom syndrome protein 1	ALMS1	Y3235
A0A087WTV6	Pyrroline-5-carboxylate reductase;Pyrroline-5-carboxylate reductase 2	PYCR2	S230
A0A087WVR3	E3 ubiquitin-protein ligase UHRF1	UHRF1	S104
A0A087WVR3	E3 ubiquitin-protein ligase UHRF1	UHRF1	S108
A0A087WVR3	E3 ubiquitin-protein ligase UHRF1	UHRF1	S300
A0A087WU05	C-Maf-inducing protein	CMIP	S190
A0A087WUA7	Zinc finger protein 804B	ZNF804B	S46
A0A087WUA7	Zinc finger protein 804B	ZNF804B	Y52
A0A087WUB9	Beta-catenin-like protein 1	CTNNBL1	S550
A0A087WUI6	Progesterone-induced-blocking factor 1	PIBF1	S662
A0A087WUI6	Progesterone-induced-blocking factor 1	PIBF1	T667
M0R202	Zinc finger protein 446	ZNF446	S311
A0A087WUQ6	Glutathione peroxidase;Glutathione peroxidase 1	GPX1	S152
A0A087WUV8	Basigin	BSG	S166
A0A087X0G7	NF-kappa-B essential modulator	IKBKG	S369
A0A087X0G7	NF-kappa-B essential modulator	IKBKG	S379
A0A087WUY5	Sorting nexin-5	SNX5	S3
B4DGW0	E3 SUMO-protein ligase PIAS2	PIAS2	S209
A0A087WUZ3	Spectrin beta chain, non-erythrocytic 1	SPTBN1	S2343
A0A087WUZ3	Spectrin beta chain, non-erythrocytic 1	SPTBN1	S2140
A0A087WUZ3	Spectrin beta chain, non-erythrocytic 1	SPTBN1	S2360
A0A087WUZ3	Spectrin beta chain, non-erythrocytic 1	SPTBN1	T2330
A0A087WUZ3	Spectrin beta chain, non-erythrocytic 1	SPTBN1	T2189
A0A087WUZ3	Spectrin beta chain, non-erythrocytic 1	SPTBN1	T2197
A0A087WV04	SUN domain-containing ossification factor	SUCO	S498
A0A087WV65	Zinc finger and BTB domain-containing protein 44	ZBTB44	S73
A0A087WV65	Zinc finger and BTB domain-containing protein 44	ZBTB44	S77
A0A087WV65	Zinc finger and BTB domain-containing protein 44	ZBTB44	S106
A0A087WV97	Stromal membrane-associated protein 2	SMAP2	S220
A0A087WVB5	Autism susceptibility gene 2 protein	AUTS2	S581
A0A087WVB5	Autism susceptibility gene 2 protein	AUTS2	S926
A0A087WVB5	Autism susceptibility gene 2 protein	AUTS2	S961
A0A087WVC5	Protein KRBA1	KRBA1	S210
A0A087WVF7	Intersectin-2	ITSN2	S867
A0A087WVF7	Intersectin-2	ITSN2	S872
A0A087WVF7	Intersectin-2	ITSN2	Y563
A0A087WVF7	Intersectin-2	ITSN2	Y951
E5RGS7	PDZ and LIM domain protein 2	PDLIM2	S60
A0A087WVQ6	Clathrin heavy chain;Clathrin heavy chain 1	CLTC	S1498
Q9NW25	Single-stranded DNA-binding protein 3	SSBP3	S237
Q9NW25	Single-stranded DNA-binding protein 3	SSBP3	S242
Q9NW25	Single-stranded DNA-binding protein 3	SSBP3	T250
A0A087WVT9	Nucleoside diphosphate kinase;Nucleoside diphosphate kinase, mitochondrial	NME4	S119
F8W7S5	Ribosome-binding protein 1	RRBP1	S300
F8W7S5	Ribosome-binding protein 1	RRBP1	S617
F8W7S5	Ribosome-binding protein 1	RRBP1	S618
E5RJK0	MAGUK p55 subfamily member 2	MPP2	S31
E5RJK0	MAGUK p55 subfamily member 2	MPP2	S110
E5RJK0	MAGUK p55 subfamily member 2	MPP2	T106
A0A087WVZ6	Protein kinase C-binding protein 1	ZMYND8	S455
A0A087WVZ6	Protein kinase C-binding protein 1	ZMYND8	S457
A0A087WVZ6	Protein kinase C-binding protein 1	ZMYND8	S528
A0A087WVZ6	Protein kinase C-binding protein 1	ZMYND8	S542
A0A087WVZ6	Protein kinase C-binding protein 1	ZMYND8	S44
A0A087WVZ6	Protein kinase C-binding protein 1	ZMYND8	S420
A0A087WVZ6	Protein kinase C-binding protein 1	ZMYND8	S401
A0A087WVZ6	Protein kinase C-binding protein 1	ZMYND8	S751
A0A087WVZ6	Protein kinase C-binding protein 1	ZMYND8	S481
A0A087WVZ6	Protein kinase C-binding protein 1	ZMYND8	S485
A0A087WVZ6	Protein kinase C-binding protein 1	ZMYND8	T741
A0A087WVZ6	Protein kinase C-binding protein 1	ZMYND8	T755
A0A087WW59	Uncharacterized protein C11orf96	C11orf96	S86
A0A1B0GTI4	Voltage-dependent P/Q-type calcium channel subunit alpha-1A	CACNA1A	S397
A0A1B0GTI4	Voltage-dependent P/Q-type calcium channel subunit alpha-1A	CACNA1A	Y392
A0A087WW76		ARHGAP21	S573
A0A087WW76		ARHGAP21	S574
A0A087WW76	Rho GTPase-activating protein 21	ARHGAP21	Y302
A0A087X2E3	Synapsin-2	SYN2	S10
A0A087X2E3	Synapsin-2	SYN2	T24
A0A087WWK8	IQ motif and SEC7 domain-containing protein 1	IQSEC1	S896
A0A087WWK8	IQ motif and SEC7 domain-containing protein 1	IQSEC1	S498
A0A087WWK8	IQ motif and SEC7 domain-containing protein 1	IQSEC1	S501
A0A087WWK8	IQ motif and SEC7 domain-containing protein 1	IQSEC1	S872
A0A087WWK8	IQ motif and SEC7 domain-containing protein 1	IQSEC1	S75
A0A087WWK8	IQ motif and SEC7 domain-containing protein 1	IQSEC1	S166
A0A087WWK8	IQ motif and SEC7 domain-containing protein 1	IQSEC1	S93
A0A087WWK8	IQ motif and SEC7 domain-containing protein 1	IQSEC1	Y897
A0A087WWK8	IQ motif and SEC7 domain-containing protein 1	IQSEC1	Y329
A0A087WWK8	IQ motif and SEC7 domain-containing protein 1	IQSEC1	Y96
A0A087WWP4	Putative RNA-binding protein 15	RBM15	S626
A0A087WWP4	Putative RNA-binding protein 15	RBM15	S630
A0A087WWP4	Putative RNA-binding protein 15	RBM15	S248
A0A087WWP4	Putative RNA-binding protein 15	RBM15	S250
A0A087WWP4	Putative RNA-binding protein 15	RBM15	S213
A0A087WWP4	Putative RNA-binding protein 15	RBM15	S215
A0A087WWP4	Putative RNA-binding protein 15	RBM15	T524
A0A087WWP4	Putative RNA-binding protein 15	RBM15	Y292
A0A087WWP4	Putative RNA-binding protein 15	RBM15	Y197
A0A087WWP4	Putative RNA-binding protein 15	RBM15	Y222
A0A087WWP4	Putative RNA-binding protein 15	RBM15	Y564
V9GYP5	Ribosomal RNA small subunit methyltransferase NEP1	EMG1	S8
A0A087WWT6	Protein CBFA2T1	RUNX1T1	S397
A0A087WWW8	Calcineurin-binding protein cabin-1	CABIN1	S1389
A0A087WWW8	Calcineurin-binding protein cabin-1	CABIN1	S383
A0A087WWW8	Calcineurin-binding protein cabin-1	CABIN1	S400
A0A087WWW8	Calcineurin-binding protein cabin-1	CABIN1	T1713
E9PJ09	PR domain-containing protein 11	PRDM11	S29
A0A087WX61	CD83 antigen	CD83	S22
A0A087WX61	CD83 antigen	CD83	S32
A0A087WYF1	Laminin subunit alpha-2	LAMA2	S365
A0A087X1Z0	PH and SEC7 domain-containing protein 3	PSD3	S98
A0A087X1Z0	PH and SEC7 domain-containing protein 3	PSD3	T240
A0A087WXK8	Protein FAM83D	FAM83D	S337
A0A087WXK8	Protein FAM83D	FAM83D	Y321
B7Z879	Vacuolar protein sorting-associated protein 11 homolog	VPS11	S914
A0A087WXM8	Basal cell adhesion molecule	BCAM	S332
A0A087WXN9	MTSS1-like protein	MTSS1L	S611
A0A087WXN9	MTSS1-like protein	MTSS1L	S578
A0A087WXN9	MTSS1-like protein	MTSS1L	S600
H3BPV0		MTSS1L	S95
H3BPV0		MTSS1L	S99
A0A087WXN9	MTSS1-like protein	MTSS1L	T543
A0A087WXN9	MTSS1-like protein	MTSS1L	T390
A0A087WXN9	MTSS1-like protein	MTSS1L	Y603
H7BXI1	Extended synaptotagmin-2	ESYT2	S721
H7BXI1	Extended synaptotagmin-2	ESYT2	S724
H7BXI1	Extended synaptotagmin-2	ESYT2	S654
H7BXI1	Extended synaptotagmin-2	ESYT2	S656
H7BXI1	Extended synaptotagmin-2	ESYT2	S701
H7BXI1	Extended synaptotagmin-2	ESYT2	S706
A0A087WXV2		PCDH17	S263
A0A087WXV2		PCDH17	S264
A0A087WXV2		PCDH17	T265
A0A087WXV6	OTU domain-containing protein 5	OTUD5	S402
A0A087WXV6	OTU domain-containing protein 5	OTUD5	S40
A0A087WXV6	OTU domain-containing protein 5	OTUD5	S479
A0A087WXV6	OTU domain-containing protein 5	OTUD5	S141
A0A087WXV6	OTU domain-containing protein 5	OTUD5	S153
A0A087WXV6	OTU domain-containing protein 5	OTUD5	T404
A0A087WXV6	OTU domain-containing protein 5	OTUD5	T365
A0A087WXV6	OTU domain-containing protein 5	OTUD5	T478
A0A087WXZ7	HEAT repeat-containing protein 6	HEATR6	S489
A0A087WXZ7	HEAT repeat-containing protein 6	HEATR6	S519
A0A087WXZ7	HEAT repeat-containing protein 6	HEATR6	S183
A0A087WXZ7	HEAT repeat-containing protein 6	HEATR6	S184
A0A087WXZ7	HEAT repeat-containing protein 6	HEATR6	S242
A0A087WXZ7	HEAT repeat-containing protein 6	HEATR6	S243
E7ERV5	Unconventional myosin-Va	MYO5A	S382
A0A087WY61	Nuclear mitotic apparatus protein 1	NUMA1	S1885
A0A087WY61	Nuclear mitotic apparatus protein 1	NUMA1	S2031
A0A087WY61	Nuclear mitotic apparatus protein 1	NUMA1	S1953
A0A087WY61	Nuclear mitotic apparatus protein 1	NUMA1	S1741
A0A087WY61	Nuclear mitotic apparatus protein 1	NUMA1	S1744
A0A087WY61	Nuclear mitotic apparatus protein 1	NUMA1	T2090
A0A087WY61	Nuclear mitotic apparatus protein 1	NUMA1	T2039
A0A087WY61	Nuclear mitotic apparatus protein 1	NUMA1	T1984
A0A087WY61	Nuclear mitotic apparatus protein 1	NUMA1	Y1758
A0A087WY82	Junctional adhesion molecule A	F11R	S267
A0A087WYH0	Spermatogenesis-associated protein 33	SPATA33	S64
A0A087WYM5	Protein TALPID3	KIAA0586	S251
A0A087WYM5	Protein TALPID3	KIAA0586	S645
A0A087WYM5	Protein TALPID3	KIAA0586	S1383
A0A087WYM5	Protein TALPID3	KIAA0586	S1081
A0A087WYT3	Prostaglandin E synthase 3	PTGES3	S117
H7BY14	Sterile alpha motif domain-containing protein 11	SAMD11	S548
H7BY14	Sterile alpha motif domain-containing protein 11	SAMD11	S377
H7BY14	Sterile alpha motif domain-containing protein 11	SAMD11	S95
A0A087WYW3	NK-tumor recognition protein;Putative peptidyl-prolyl cis-trans isomerase	NKTR	S163
A0A087WYW3	NK-tumor recognition protein;Putative peptidyl-prolyl cis-trans isomerase	NKTR	S116
A0A087WYW3	NK-tumor recognition protein;Putative peptidyl-prolyl cis-trans isomerase	NKTR	T855
A0A087WZ06	Serine/threonine-protein kinase 3;Serine/threonine-protein kinase 3 36kDa subunit;Serine/threonine-protein kinase 3 20kDa subunit	STK3	S205
A0A087WZ06	Serine/threonine-protein kinase 3;Serine/threonine-protein kinase 3 36kDa subunit;Serine/threonine-protein kinase 3 20kDa subunit	STK3	S274
A0A087WZ13	Ribonucleoprotein PTB-binding 1	RAVER1	S672
A0A087WZ32	Pleckstrin homology domain-containing family A member 2	PLEKHA2	S264
E7EM53	Protocadherin-15	PCDH15	S1616
E7EM53	Protocadherin-15	PCDH15	S1623
A0A087WZG6	Partitioning defective 3 homolog B	PARD3B	S656
A0A087WZG6	Partitioning defective 3 homolog B	PARD3B	Y881
A0A087WZG6	Partitioning defective 3 homolog B	PARD3B	Y921
A0A087WZK9	Eukaryotic translation initiation factor 3 subunit H	EIF3H	S180
A0A087WZK9	Eukaryotic translation initiation factor 3 subunit H	EIF3H	Y257
A0A087X0R1	Dehydrogenase/reductase SDR family member 11	DHRS11	S31
A0A087WZP2	Dachshund homolog 1	DACH1	S491
A0A087WZP2	Dachshund homolog 1	DACH1	S497
A0A087WZP2	Dachshund homolog 1	DACH1	S725
A0A087WZP2	Dachshund homolog 1	DACH1	T578
A0A087WZP2	Dachshund homolog 1	DACH1	T582
A0A087WZP2	Dachshund homolog 1	DACH1	T727
A0A087WZT7	Growth arrest-specific protein 8	GAS8	S208
A0A087WZU1	Protein-tyrosine-phosphatase	PTPRQ	S284
A0A087WZU8	Cellular tumor antigen p53	TP53	S381
A0A087WZV0	Inositol hexakisphosphate and diphosphoinositol-pentakisphosphate kinase 2	PPIP5K2	S1215
K7ENU7		PPIP5K2	Y85
A0A087WZX0	B-cell CLL/lymphoma 9-like protein	BCL9L	S776
A0A087WZX0	B-cell CLL/lymphoma 9-like protein	BCL9L	S967
A0A087WZX0	B-cell CLL/lymphoma 9-like protein	BCL9L	S973
A0A087WZX6	ATP-binding cassette sub-family A member 7	ABCA7	S57
A0A087WZX6	ATP-binding cassette sub-family A member 7	ABCA7	T46
A0A087WZX6	ATP-binding cassette sub-family A member 7	ABCA7	Y59
J3KPF9	Kinesin-like protein;Kinesin-like protein KIF3A	KIF3A	S30
J3KPF9	Kinesin-like protein;Kinesin-like protein KIF3A	KIF3A	S38
J3KPF9	Kinesin-like protein;Kinesin-like protein KIF3A	KIF3A	T695
J3KPF9	Kinesin-like protein;Kinesin-like protein KIF3A	KIF3A	Y33
J3KPF9	Kinesin-like protein;Kinesin-like protein KIF3A	KIF3A	Y535
F8VQD8	CCR4-NOT transcription complex subunit 2	CNOT2	S16
F8VQD8	CCR4-NOT transcription complex subunit 2	CNOT2	S23
A0A0U1RRH1	Ryanodine receptor 3	RYR3	S2872
A0A0U1RRH1	Ryanodine receptor 3	RYR3	S2879
A0A0U1RRH1	Ryanodine receptor 3	RYR3	Y2869
A0A087X0D9	AN1-type zinc finger protein 2B	ZFAND2B	S131
A0A087X0D9	AN1-type zinc finger protein 2B	ZFAND2B	S139
A0A087X0D9	AN1-type zinc finger protein 2B	ZFAND2B	T141
A0A087X0H7	Phospholipase DDHD1	DDHD1	S594
A0A087X0I9	Protein kinase C;Protein kinase C theta type	PRKCQ	S649
A0A087X0I9	Protein kinase C;Protein kinase C theta type	PRKCQ	S287
A0A087X0I9	Protein kinase C;Protein kinase C theta type	PRKCQ	S659
A0A087X0K9		TJP1	S900
A0A087X0K9		TJP1	Y911
A0A087X0M4	Kanadaptin	SLC4A1AP	S412
A0A087X0M4	Kanadaptin	SLC4A1AP	S476
A0A087X0M4	Kanadaptin	SLC4A1AP	S258
A0A087X0M4	Kanadaptin	SLC4A1AP	S28
A0A087X0M4	Kanadaptin	SLC4A1AP	Y719
A0A087X0N3	Nucleolar protein 4-like	NOL4L	S644
A0A087X0P0	Kinesin-like protein;Centromere-associated protein E	CENPE	S2082
H0Y6I7	Lysine-specific demethylase 6A	KDM6A	S416
H0Y6I7	Lysine-specific demethylase 6A	KDM6A	S427
B4DZ96	Probable tubulin polyglutamylase TTLL9	TTLL9	S178
B4DZ96	Probable tubulin polyglutamylase TTLL9	TTLL9	Y190
A0A087X165		SRCIN1	S199
A0A087X165		SRCIN1	S191
A0A087X165	SRC kinase signaling inhibitor 1	SRCIN1	Y430
A0A087X165	SRC kinase signaling inhibitor 1	SRCIN1	Y434
G3V2G2	Ataxin-3	ATXN3	S86
G3V2G2	Ataxin-3	ATXN3	S40
A0A087X1A9	Vesicle-trafficking protein SEC22b	SEC22B	S12
A0A087X1H5	Arf-GAP with coiled-coil, ANK repeat and PH domain-containing protein 2	ACAP2	S333
A0A087X1H5	Arf-GAP with coiled-coil, ANK repeat and PH domain-containing protein 2	ACAP2	S344
A0A087X1H5	Arf-GAP with coiled-coil, ANK repeat and PH domain-containing protein 2	ACAP2	Y741
A0A087X1H5	Arf-GAP with coiled-coil, ANK repeat and PH domain-containing protein 2	ACAP2	Y749
A0A087X1H5	Arf-GAP with coiled-coil, ANK repeat and PH domain-containing protein 2	ACAP2	Y585
S4R3Y0	MAP3K12-binding inhibitory protein 1	MBIP	S49
J3QT73	COP9 signalosome complex subunit 7b	COPS7B	S89
A0A087X1Q5		SOCS7	S317
A0A087X1T2	Sterol regulatory element-binding protein 2;Processed sterol regulatory element-binding protein 2	SREBF2	S439
A0A087X1X6	Forkhead box protein N2	FOXN2	S182
H0Y882	Forkhead box protein P1	FOXP1	S521
H0Y882	Forkhead box protein P1	FOXP1	S55
H0Y882	Forkhead box protein P1	FOXP1	S336
F1T0B3	ATP-dependent RNA helicase DDX1	DDX1	S400
A0A087X2H1	E3 ubiquitin-protein ligase HECTD1	HECTD1	S1388
A0A087X2H1	E3 ubiquitin-protein ligase HECTD1	HECTD1	S1537
A0A087X2H1	E3 ubiquitin-protein ligase HECTD1	HECTD1	S1776
A0A087X2H1	E3 ubiquitin-protein ligase HECTD1	HECTD1	T1764
A0A087X2H1	E3 ubiquitin-protein ligase HECTD1	HECTD1	T1804
A0A087X2H1	E3 ubiquitin-protein ligase HECTD1	HECTD1	Y1755
A0A087X2H1	E3 ubiquitin-protein ligase HECTD1	HECTD1	Y1038
A0A088AWN2	WD repeat-containing protein 20	WDR20	S496
A0A096LNH6	Dedicator of cytokinesis protein 1	DOCK1	S1785
A0A096LNH6	Dedicator of cytokinesis protein 1	DOCK1	S1764
A0A096LNH6	Dedicator of cytokinesis protein 1	DOCK1	S1772
A0A096LNH6	Dedicator of cytokinesis protein 1	DOCK1	T1793
A0A096LNH6	Dedicator of cytokinesis protein 1	DOCK1	Y1832
A0A096LNM2	F-box/WD repeat-containing protein 5	FBXW5	S100
A0A096LNZ3	DALR anticodon-binding domain-containing protein 3	DALRD3	S42
A0A096LP25	Uncharacterized protein FLJ45252	AAK1	S450
A0A096LP25	Uncharacterized protein FLJ45252	AAK1	S249
A0A096LP25	Uncharacterized protein FLJ45252	AAK1	S223
A0A0A0MTC7	Laminin subunit alpha-4	LAMA4	S727
A0A0A0MQU4		SCLY	S4
A0A0A0MQW1	Kinase suppressor of Ras 1	KSR1	S492
A0A0A0MQW1	Kinase suppressor of Ras 1	KSR1	S329
A0A0A0MQW1	Kinase suppressor of Ras 1	KSR1	T193
A0A0A0MQW1	Kinase suppressor of Ras 1	KSR1	T196
A0A0A0MQW1	Kinase suppressor of Ras 1	KSR1	T197
B3TIK8	Corticotropin-releasing factor receptor 1	CRHR1	S307
A0A0A0MR03	RNA polymerase II subunit A C-terminal domain phosphatase	CTDP1	S720
A0A0A0MR09	Protein-tyrosine-phosphatase;Tyrosine-protein phosphatase non-receptor type 9	PTPN9	S314
A0A0A0MR09	Protein-tyrosine-phosphatase;Tyrosine-protein phosphatase non-receptor type 9	PTPN9	T308
F5H3Q7	RPA-interacting protein	RPAIN	S36
A0A0A0MR66	RNA-binding protein 10	RBM10	S862
A0A0A0MR66	RNA-binding protein 10	RBM10	S801
A0A0A0MR66	RNA-binding protein 10	RBM10	S803
A0A0A0MR66	RNA-binding protein 10	RBM10	S154
A0A0A0MR66	RNA-binding protein 10	RBM10	Y759
A0A0A0MR68	Synapsin-3	SYN3	S284
H0Y702	SCL-interrupting locus protein	STIL	S93
A0A0A0MRA8	Band 4.1-like protein 3;Band 4.1-like protein 3, N-terminally processed	EPB41L3	S478
A0A0A0MRA8	Band 4.1-like protein 3;Band 4.1-like protein 3, N-terminally processed	EPB41L3	S793
A0A0A0MRA8	Band 4.1-like protein 3;Band 4.1-like protein 3, N-terminally processed	EPB41L3	T487
A0A0A0MRA8	Band 4.1-like protein 3;Band 4.1-like protein 3, N-terminally processed	EPB41L3	T510
F8W8U2	MAP kinase-activating death domain protein	MADD	S49
K7ENH8	Transcription factor E2-alpha	TCF3	S15
K7ENH8		TCF3	S193
K7ENH8	Transcription factor E2-alpha	TCF3	S172
K7ENH8	Transcription factor E2-alpha	TCF3	S177
K7ENH8	Transcription factor E2-alpha	TCF3	T171
A0A0A0MRE1	Exocyst complex component 7	EXOC7	S198
A0A0A0MRE1	Exocyst complex component 7	EXOC7	S205
A0A0A0MRE1	Exocyst complex component 7	EXOC7	Y204
G3V5X4		SYNE2	S2436
G3V5X4		SYNE2	S2442
G3V5X4		SYNE2	S2453
G3V5X4	Nesprin-2	SYNE2	T4031
H7BYL6	A-kinase anchor protein 9	AKAP9	S182
H7BYL6	A-kinase anchor protein 9	AKAP9	S1688
H7BYL6	A-kinase anchor protein 9	AKAP9	Y1469
A0A0A0MRG9	CDK5 regulatory subunit-associated protein 2	CDK5RAP2	S1008
A0A0A0MRG9	CDK5 regulatory subunit-associated protein 2	CDK5RAP2	S1120
A0A0A0MRH8	Chromodomain-helicase-DNA-binding protein 1-like	CHD1L	S355
A0A0A0MRI1	GPALPP motifs-containing protein 1	GPALPP1	S103
A0A0A0MRJ0	Non-specific serine/threonine protein kinase;Serine/threonine-protein kinase MRCK alpha	CDC42BPA	S1688
A0A0A0MRJ0	Non-specific serine/threonine protein kinase;Serine/threonine-protein kinase MRCK alpha	CDC42BPA	S1691
A0A0A0MRJ0	Non-specific serine/threonine protein kinase;Serine/threonine-protein kinase MRCK alpha	CDC42BPA	S1596
A0A0A0MRJ0	Non-specific serine/threonine protein kinase;Serine/threonine-protein kinase MRCK alpha	CDC42BPA	S1602
A0A0A0MRJ0	Non-specific serine/threonine protein kinase;Serine/threonine-protein kinase MRCK alpha	CDC42BPA	S1578
F8W8M4	Actin-binding LIM protein 1	ABLIM1	S307
F8W8M4	Actin-binding LIM protein 1	ABLIM1	S595
F8W8M4	Actin-binding LIM protein 1	ABLIM1	S371
F8W8M4	Actin-binding LIM protein 1	ABLIM1	S375
F8W8M4	Actin-binding LIM protein 1	ABLIM1	Y313
F8W8M4	Actin-binding LIM protein 1	ABLIM1	Y379
F8W8M4	Actin-binding LIM protein 1	ABLIM1	Y297
J3QSX6		ABLIM1	Y145
A0A0A0MRM8		MYO6	S1110
A0A0A0MRM8		MYO6	T1112
A0A0A0MRM9	Nucleolar and coiled-body phosphoprotein 1	NOLC1	S589
A0A0A0MRM9	Nucleolar and coiled-body phosphoprotein 1	NOLC1	S591
A0A0A0MRM9	Nucleolar and coiled-body phosphoprotein 1	NOLC1	S695
A0A0A0MRM9	Nucleolar and coiled-body phosphoprotein 1	NOLC1	S707
A0A0A0MRM9	Nucleolar and coiled-body phosphoprotein 1	NOLC1	T616
A0A0A0MRM9	Nucleolar and coiled-body phosphoprotein 1	NOLC1	T619
A0A0A0MRN5	Opioid growth factor receptor	OGFR	S485
A0A0A0MRN5	Opioid growth factor receptor	OGFR	S505
A0A0A0MRN5	Opioid growth factor receptor	OGFR	S351
A0A0A0MRN5	Opioid growth factor receptor	OGFR	S432
A0A0A0MRN5	Opioid growth factor receptor	OGFR	S533
A0A0A0MRN5	Opioid growth factor receptor	OGFR	T529
A0A0A0MRP0	MAP7 domain-containing protein 3	MAP7D3	S400
A0A0A0MRP0	MAP7 domain-containing protein 3	MAP7D3	S408
A0A0A0MRP0	MAP7 domain-containing protein 3	MAP7D3	S483
A0A0A0MRP0	MAP7 domain-containing protein 3	MAP7D3	S416
A0A0A0MRP0	MAP7 domain-containing protein 3	MAP7D3	S420
A0A0A0MRP0	MAP7 domain-containing protein 3	MAP7D3	S468
A0A0A0MRP0	MAP7 domain-containing protein 3	MAP7D3	T256
A0A0A0MRP9	Serologically defined colon cancer antigen 3	SDCCAG3	S190
A0A0A0MRP9	Serologically defined colon cancer antigen 3	SDCCAG3	S193
A0A0A0MRP9	Serologically defined colon cancer antigen 3	SDCCAG3	S197
A0A0A0MRS8	Kinesin-like protein;Kinesin-like protein KIF17	KIF17	S269
A0A0A0MRS8	Kinesin-like protein;Kinesin-like protein KIF17	KIF17	S845
Q5T586	Protein FAM219A	FAM219A	S27
C9JB16	ELAV-like protein;ELAV-like protein 2	ELAVL2	S86
A0A0A0MS59	Helicase SRCAP	SRCAP	S365
A0A0A0MS59	Helicase SRCAP	SRCAP	S371
A0A0A0MS59	Helicase SRCAP	SRCAP	S2528
A0A0A0MS59	Helicase SRCAP	SRCAP	S2531
A0A0A0MS59	Helicase SRCAP	SRCAP	S2757
A0A0A0MS59	Helicase SRCAP	SRCAP	S2466
A0A0A0MS59	Helicase SRCAP	SRCAP	S61
A0A0A0MS59	Helicase SRCAP	SRCAP	T375
A0A0A0MS66	Phosphatidate phosphatase LPIN1	LPIN1	S491
G3V578	Protein NDRG2	NDRG2	S241
G3V578	Protein NDRG2	NDRG2	S245
G3V578	Protein NDRG2	NDRG2	S248
G3V578	Protein NDRG2	NDRG2	S251
G3V578	Protein NDRG2	NDRG2	S257
G3V578	Protein NDRG2	NDRG2	S263
G3V578	Protein NDRG2	NDRG2	S266
G3V578	Protein NDRG2	NDRG2	T243
K7EPZ6	Methyl-CpG-binding domain protein 1	MBD1	S196
K7EPZ6	Methyl-CpG-binding domain protein 1	MBD1	S198
K7EPZ6	Methyl-CpG-binding domain protein 1	MBD1	T202
A0A0A0MTS5	Laminin subunit alpha-3	LAMA3	S815
A0A0A0MTS5	Laminin subunit alpha-3	LAMA3	T813
A0A0A0MTS5	Laminin subunit alpha-3	LAMA3	T817
A0A0A0MSC8	Slit homolog 3 protein	SLIT3	S57
A0A0A0MSC8	Slit homolog 3 protein	SLIT3	T50
B5MC85		RMDN2	S163
B3KPJ4	Polyhomeotic-like protein 2	PHC2	S357
B3KPJ4		PHC2	S67
A0A0A0MSK6	Rho GTPase-activating protein 5	ARHGAP5	S1217
A0A0A0MSK6	Rho GTPase-activating protein 5	ARHGAP5	S1194
A0A0A0MSK6	Rho GTPase-activating protein 5	ARHGAP5	S1201
A0A0A0MSK6	Rho GTPase-activating protein 5	ARHGAP5	T954
A0A0A0MSN7	Protein arginine N-methyltransferase 3	PRMT3	S109
A0A0A0MSQ0	Plastin-3	PLS3	S313
A0A0A0MSQ0	Plastin-3	PLS3	S271
A0A0A0MSQ9	Vacuolar fusion protein MON1 homolog A	MON1A	S99
A0A0A0MSQ9	Vacuolar fusion protein MON1 homolog A	MON1A	S64
X6RGK9	SLAIN motif-containing protein 1	SLAIN1	S168
X6RGK9	SLAIN motif-containing protein 1	SLAIN1	S199
A0A0A0MST9	MAP/microtubule affinity-regulating kinase 3	MARK3	S461
A0A0A0MST9	MAP/microtubule affinity-regulating kinase 3	MARK3	S464
A0A0A0MST9	MAP/microtubule affinity-regulating kinase 3	MARK3	S390
A0A0A0MST9	MAP/microtubule affinity-regulating kinase 3	MARK3	S300
A0A0A0MST9	MAP/microtubule affinity-regulating kinase 3	MARK3	S301
A0A0A0MST9	MAP/microtubule affinity-regulating kinase 3	MARK3	S340
A0A0A0MST9	MAP/microtubule affinity-regulating kinase 3	MARK3	T457
A0A0A0MST9	MAP/microtubule affinity-regulating kinase 3	MARK3	T359
A0A0A0MSW3	Nuclear pore complex protein Nup214	NUP214	S510
A0A0A0MSW3	Nuclear pore complex protein Nup214	NUP214	S86
A0A0A0MSW3	Nuclear pore complex protein Nup214	NUP214	S473
A0A0A0MSW3	Nuclear pore complex protein Nup214	NUP214	S452
A0A0A0MSW3	Nuclear pore complex protein Nup214	NUP214	T741
A0A0A0MSW3	Nuclear pore complex protein Nup214	NUP214	T585
A0A0A0MSX4	Roundabout homolog 1	ROBO1	S1372
A0A0A0MSX4	Roundabout homolog 1	ROBO1	S1322
A0A0A0MSX4	Roundabout homolog 1	ROBO1	S820
A0A0A0MSX4	Roundabout homolog 1	ROBO1	Y829
A0A0A0MSX4	Roundabout homolog 1	ROBO1	Y1104
A0A0A0MSX4	Roundabout homolog 1	ROBO1	Y812
A0A0A0MSX4	Roundabout homolog 1	ROBO1	Y899
A0A0A0MSX4	Roundabout homolog 1	ROBO1	Y994
A0A0A0MSX4	Roundabout homolog 1	ROBO1	Y918
A0A0A0MSX4	Roundabout homolog 1	ROBO1	Y1467
H0Y6G2	Calcium/calmodulin-dependent protein kinase type II subunit gamma	CAMK2G	S120
A0A0A0MT33	Protein SCAF8	SCAF8	S695
A0A0A0MT33	Protein SCAF8	SCAF8	S351
A0A0A0MT33	Protein SCAF8	SCAF8	Y1315
Q9HBD4	Transcription activator BRG1	SMARCA4	S1659
Q9HBD4	Transcription activator BRG1	SMARCA4	S1663
Q9HBD4	Transcription activator BRG1	SMARCA4	S1484
A0A0A0MT60	Peptidyl-prolyl cis-trans isomerase;FK506-binding protein 15	FKBP15	S1220
A0A0A0MT60	Peptidyl-prolyl cis-trans isomerase;FK506-binding protein 15	FKBP15	S336
A0A0A0MT60	Peptidyl-prolyl cis-trans isomerase;FK506-binding protein 15	FKBP15	S1004
A0A0A0MT60	Peptidyl-prolyl cis-trans isomerase;FK506-binding protein 15	FKBP15	S1139
A0A0A0MT60	Peptidyl-prolyl cis-trans isomerase;FK506-binding protein 15	FKBP15	S981
A0A0A0MT60	Peptidyl-prolyl cis-trans isomerase;FK506-binding protein 15	FKBP15	S985
A0A0A0MT60	Peptidyl-prolyl cis-trans isomerase;FK506-binding protein 15	FKBP15	S371
A0A0A0MT60	Peptidyl-prolyl cis-trans isomerase;FK506-binding protein 15	FKBP15	S1187
A0A0A0MT60	Peptidyl-prolyl cis-trans isomerase;FK506-binding protein 15	FKBP15	S1189
A0A0A0MT60	Peptidyl-prolyl cis-trans isomerase;FK506-binding protein 15	FKBP15	T1228
A0A0A0MT72	Cerebral cavernous malformations 2 protein	CCM2	S378
A0A0A0MT72	Cerebral cavernous malformations 2 protein	CCM2	S158
A0A0A0MT72	Cerebral cavernous malformations 2 protein	CCM2	S162
A0A0A0MTD1	Double-stranded RNA-binding protein Staufen homolog 2	STAU2	S417
A0A0A0MTD1	Double-stranded RNA-binding protein Staufen homolog 2	STAU2	S378
A0A0A0MTD1	Double-stranded RNA-binding protein Staufen homolog 2	STAU2	S402
A0A0A0MTD1	Double-stranded RNA-binding protein Staufen homolog 2	STAU2	Y382
E9PNV5	Neuron navigator 2	NAV2	S254
A0A0A0MTG6	Sterol regulatory element-binding protein cleavage-activating protein	SCAP	S448
A0A0A0MTG6	Sterol regulatory element-binding protein cleavage-activating protein	SCAP	S533
A0A0A0MTI2	SH2B adapter protein 2	SH2B2	S353
U3KQI1	Peptidyl-prolyl cis-trans isomerase FKBP8	FKBP8	S17
U3KQI1	Peptidyl-prolyl cis-trans isomerase FKBP8	FKBP8	Y43
U3KQJ0	M-phase phosphoprotein 9	MPHOSPH9	S65
A0A0A0MTP7	Protein SCAF11	SCAF11	S736
A0A0A0MTP7	Protein SCAF11	SCAF11	S738
A0A0A0MTP7	Protein SCAF11	SCAF11	S742
A0A0A0MTP7	Protein SCAF11	SCAF11	S671
A0A0A0MTP7	Protein SCAF11	SCAF11	S528
A0A0A0MTP7	Protein SCAF11	SCAF11	S353
A0A0A0MTP7	Protein SCAF11	SCAF11	S548
A0A0A0MTP7	Protein SCAF11	SCAF11	S716
A0A0A0MTP7	Protein SCAF11	SCAF11	Y501
A0A0B4J1V9	Lymphoid-specific helicase	HELLS	S549
A0A0B4J1V9	Lymphoid-specific helicase	HELLS	S875
A0A0B4J1V9	Lymphoid-specific helicase	HELLS	S878
A0A0B4J1V9	Lymphoid-specific helicase	HELLS	S879
A0A0B4J1V9	Lymphoid-specific helicase	HELLS	S694
H0YEG1	Mediator of RNA polymerase II transcription subunit 24	MED24	S38
H0YEG1	Mediator of RNA polymerase II transcription subunit 24	MED24	S49
A0A0B4J1W3	N-alpha-acetyltransferase 15, NatA auxiliary subunit	NAA15	S854
A0A0B4J269	Tubulin beta-3 chain	TUBB3	S669
A0A0B4J2A3	Protein phosphatase 1 regulatory subunit 14A	PPP1R14A	S58
A0A0C4DFM2	Zinc finger protein 574	ZNF574	S254
A0A0C4DFM2	Zinc finger protein 574	ZNF574	S807
E9PKY2	Terminal uridylyltransferase 4	ZCCHC11	S770
Q4KN30	Killer cell lectin-like receptor subfamily F member 1	KLRF1	S19
Q4KN30	Killer cell lectin-like receptor subfamily F member 1	KLRF1	T26
A0A0C4DFQ2	Zinc finger and BTB domain-containing protein 34	ZBTB34	S467
A0A0C4DFR6	Protein SEC13 homolog	SEC13	S314
A0A0C4DFS4	NMDA receptor synaptonuclear signaling and neuronal migration factor	NSMF	S125
A0A0C4DFT3	Disks large homolog 1	DLG1	S534
A0A0C4DFT3	Disks large homolog 1	DLG1	S540
A0A0C4DFT3	Disks large homolog 1	DLG1	S542
S4R3P7	GTPase-activating Rap/Ran-GAP domain-like protein 3	GARNL3	S14
H0Y3X6	Negative elongation factor A	NELFA	S367
H0Y3X6	Negative elongation factor A	NELFA	T161
H0Y3X6	Negative elongation factor A	NELFA	T281
H7C3Q7	Abl interactor 2	ABI2	S82
H7C3Q7	Abl interactor 2	ABI2	Y79
A0A0C4DG26	Carbohydrate-responsive element-binding protein	MLXIPL	S268
A0A0C4DG33	Peroxisome biogenesis factor 1	PEX1	S1124
A0A0C4DG40	Nesprin-1	SYNE1	S8152
A0A0C4DG40	Nesprin-1	SYNE1	S4922
A0A0C4DG40	Nesprin-1	SYNE1	T8312
A0A0C4DG88	POU domain protein;POU domain, class 2, transcription factor 1	POU2F1	S186
A0A0C4DG98	THO complex subunit 2	THOC2	S1335
A0A0C4DG98	THO complex subunit 2	THOC2	S1275
A0A0C4DG98	THO complex subunit 2	THOC2	S1278
A0A0C4DG98	THO complex subunit 2	THOC2	T1328
A0A0C4DG98	THO complex subunit 2	THOC2	Y1324
A0A0C4DGC6	Group XIIA secretory phospholipase A2	PLA2G12A	S160
A0A0C4DGC6	Group XIIA secretory phospholipase A2	PLA2G12A	Y169
A0A0C4DGG9	Chromodomain-helicase-DNA-binding protein 4	CHD4	S1305
A0A0C4DGG9	Chromodomain-helicase-DNA-binding protein 4	CHD4	S1595
A0A0C4DGG9	Chromodomain-helicase-DNA-binding protein 4	CHD4	S1601
A0A0C4DGG9	Chromodomain-helicase-DNA-binding protein 4	CHD4	S1569
A0A0C4DGG9	Chromodomain-helicase-DNA-binding protein 4	CHD4	S1673
A0A0C4DGG9	Chromodomain-helicase-DNA-binding protein 4	CHD4	S1627
A0A0C4DGG9	Chromodomain-helicase-DNA-binding protein 4	CHD4	S512
A0A0C4DGG9	Chromodomain-helicase-DNA-binding protein 4	CHD4	T1704
A0A0C4DGG9	Chromodomain-helicase-DNA-binding protein 4	CHD4	T700
A0A0C4DGG9	Chromodomain-helicase-DNA-binding protein 4	CHD4	T1570
A0A0C4DGG9	Chromodomain-helicase-DNA-binding protein 4	CHD4	T1578
A0A0C4DGG9	Chromodomain-helicase-DNA-binding protein 4	CHD4	T1678
A0A0C4DGH6	UHRF1-binding protein 1-like	UHRF1BP1L	S585
A0A0C4DGP2	Kinesin-like protein;Kinesin-like protein KIF18B	KIF18B	S404
A0A0C4DGP2	Kinesin-like protein;Kinesin-like protein KIF18B	KIF18B	T729
A0A0C4DGP8	Centrosomal protein of 89 kDa	CEP89	S117
A0A0C4DGP9	Zinc finger protein 568	ZNF568	S413
A0A0C4DGP9	Zinc finger protein 568	ZNF568	Y410
R4GNJ5	Adrenocortical dysplasia protein homolog	ACD	S25
R4GNJ5	Adrenocortical dysplasia protein homolog	ACD	S313
R4GNJ5	Adrenocortical dysplasia protein homolog	ACD	S346
A0A0C4DGU2	Methylmalonic aciduria and homocystinuria type C protein	MMACHC	S211
A0A0C4DGW7	Protein FAM47A	FAM47A	S422
A0A0C4DH01	DNA-directed RNA polymerase III subunit RPC5	POLR3E	S467
M0R351	Latent-transforming growth factor beta-binding protein 4	LTBP4	S216
A0A0C4DH60	Serine/threonine-protein kinase 33	STK33	S159
Q5T321	Neurobeachin	NBEA	S1526
A0A0D9SF54	Spectrin alpha chain, non-erythrocytic 1	SPTAN1	S1197
A0A0D9SF54	Spectrin alpha chain, non-erythrocytic 1	SPTAN1	Y1156
A0A0D9SFB1	Dynamin-1	DNM1	S793
A0A0D9SGF3	Myocyte-specific enhancer factor 2C	MEF2C	S299
A0A0D9SGF3	Myocyte-specific enhancer factor 2C	MEF2C	S313
A0A0D9SGF3	Myocyte-specific enhancer factor 2C	MEF2C	S96
A0A0D9SGF3	Myocyte-specific enhancer factor 2C	MEF2C	S102
A0A0D9SFD2	Protein THEMIS	THEMIS	S505
A0A0D9SFL5	Trafficking kinesin-binding protein 1	TRAK1	S815
A0A0D9SG19	Regulating synaptic membrane exocytosis protein 2	RIMS2	S258
A0A0D9SG19	Regulating synaptic membrane exocytosis protein 2	RIMS2	Y249
A0A0D9SG79	Ubiquitin-associated protein 1	UBAP1	S172
A0A0D9SGJ6	Synaptojanin-1	SYNJ1	S1298
A0A0D9SGJ6	Synaptojanin-1	SYNJ1	S1338
A0A0G2JMG3	Multidrug resistance-associated protein 6	ABCC6	S1229
A0A0G2JMG3	Multidrug resistance-associated protein 6	ABCC6	T1224
A0A0G2JMS7	Protein scribble homolog	SCRIB	S1485
A0A0G2JMS7	Protein scribble homolog	SCRIB	S1606
A0A0G2JPD5	Microtubule-associated protein tau	MAPT	S428
I3L170	Microtubule-associated protein	MAPT	Y210
A0A0G2JMZ6	Kinesin heavy chain isoform 5C	KIF5C	S837
A0A0G2JMZ6	Kinesin heavy chain isoform 5C	KIF5C	S838
A1BQX2	MARVEL domain-containing protein 2	MARVELD2	S271
A1BQX2	MARVEL domain-containing protein 2	MARVELD2	Y441
H0Y6V4	Protein-tyrosine-phosphatase;Receptor-type tyrosine-protein phosphatase kappa	PTPRK	S116
H0Y6V4	Protein-tyrosine-phosphatase;Receptor-type tyrosine-protein phosphatase kappa	PTPRK	T114
H0Y6V4	Protein-tyrosine-phosphatase;Receptor-type tyrosine-protein phosphatase kappa	PTPRK	Y118
H0YA31	Pantothenate kinase 4	PANK4	S110
H0YA31	Pantothenate kinase 4	PANK4	S99
H0YA31	Pantothenate kinase 4	PANK4	T112
A0A0G2JR65	Mucin-2	MUC2	S962
A0A0J9YVR0	Phosphatase and actin regulator 4	PHACTR4	S158
A0A0J9YY34	NHS-like protein 2	NHSL2	S576
A0A0J9YYF7	Disheveled-associated activator of morphogenesis 2	DAAM2	S665
A0A0J9YYF7	Disheveled-associated activator of morphogenesis 2	DAAM2	Y670
A0A0J9YYJ3	Transmembrane protein 184B	TMEM184B	S343
A0A0J9YYJ3	Transmembrane protein 184B	TMEM184B	S344
A0A0R4J2E4	Fas-binding factor 1	FBF1	S101
A0A0R4J2E4	Fas-binding factor 1	FBF1	S102
A0A0R4J2E4	Fas-binding factor 1	FBF1	S694
A0A0R4J2E4	Fas-binding factor 1	FBF1	S697
A0A0U1RQE0	Forkhead box protein P2	FOXP2	S412
A0A0U1RQE0	Forkhead box protein P2	FOXP2	T410
A0A0U1RQE4	SH3 domain-containing protein 19	SH3D19	S428
A0A0U1RQE4	SH3 domain-containing protein 19	SH3D19	S430
A0A0U1RQE4	SH3 domain-containing protein 19	SH3D19	S431
A0A0U1RQF0	Fatty acid synthase;[Acyl-carrier-protein] S-acetyltransferase;[Acyl-carrier-protein] S-malonyltransferase;3-oxoacyl-[acyl-carrier-protein] synthase;3-oxoacyl-[acyl-carrier-protein] reductase;3-hydroxyacyl-[acyl-carrier-protein] dehydratase;Enoyl-[acyl-carrier-protein] reductase;Oleoyl-[acyl-carrier-protein] hydrolase	FASN	S1745
A0A0U1RQF0	Fatty acid synthase;[Acyl-carrier-protein] S-acetyltransferase;[Acyl-carrier-protein] S-malonyltransferase;3-oxoacyl-[acyl-carrier-protein] synthase;3-oxoacyl-[acyl-carrier-protein] reductase;3-hydroxyacyl-[acyl-carrier-protein] dehydratase;Enoyl-[acyl-carrier-protein] reductase;Oleoyl-[acyl-carrier-protein] hydrolase	FASN	S1754
A0A0U1RQF0	Fatty acid synthase;[Acyl-carrier-protein] S-acetyltransferase;[Acyl-carrier-protein] S-malonyltransferase;3-oxoacyl-[acyl-carrier-protein] synthase;3-oxoacyl-[acyl-carrier-protein] reductase;3-hydroxyacyl-[acyl-carrier-protein] dehydratase;Enoyl-[acyl-carrier-protein] reductase;Oleoyl-[acyl-carrier-protein] hydrolase	FASN	T2202
A0A0U1RQK7	Eukaryotic translation initiation factor 4 gamma 3	EIF4G3	S1596
A0A0U1RQK7	Eukaryotic translation initiation factor 4 gamma 3	EIF4G3	S1598
A0A0U1RQK7	Eukaryotic translation initiation factor 4 gamma 3	EIF4G3	S684
A0A0U1RQQ9	SCY1-like protein 2	SCYL2	S681
A0A0U1RQQ9	SCY1-like protein 2	SCYL2	T811
A0A0U1RR93	SH3 and multiple ankyrin repeat domains protein 3	SHANK3	S775
A0A0U1RR27	C-myc promoter-binding protein	DENND4A	S1005
A0A0U1RR27	C-myc promoter-binding protein	DENND4A	S1325
A0A0U1RR27	C-myc promoter-binding protein	DENND4A	S1195
A0A0U1RR27	C-myc promoter-binding protein	DENND4A	S1633
A0A0U1RR27	C-myc promoter-binding protein	DENND4A	S1269
A0A0U1RR63	Phosphatidylinositol 3,4,5-trisphosphate 3-phosphatase and dual-specificity protein phosphatase PTEN	PTEN	S467
A0A0U1RRA6	R3H domain-containing protein 2	R3HDM2	S339
A0A0U1RRA6	R3H domain-containing protein 2	R3HDM2	S845
A0A0U1RRA6	R3H domain-containing protein 2	R3HDM2	T846
A0A0U1RRM1	Transcriptional repressor p66-beta	GATAD2B	S470
A0A0U1RRM1	Transcriptional repressor p66-beta	GATAD2B	S317
A0A0U1RRM1	Transcriptional repressor p66-beta	GATAD2B	S318
A0A0U1RRM1	Transcriptional repressor p66-beta	GATAD2B	S322
A0A0U1RRM1	Transcriptional repressor p66-beta	GATAD2B	Y301
A0A0U1RRM6	Protein enabled homolog	ENAH	S129
A0A0U1RRM6	Protein enabled homolog	ENAH	S740
A0A0X1KG71	Negative elongation factor B	NELFB	S605
A0A140T936	Valine--tRNA ligase	VARS	S446
A2AB15	Putative pre-mRNA-splicing factor ATP-dependent RNA helicase DHX16	DHX16	S43
A2AB15	Putative pre-mRNA-splicing factor ATP-dependent RNA helicase DHX16	DHX16	S46
A2AB15	Putative pre-mRNA-splicing factor ATP-dependent RNA helicase DHX16	DHX16	S100
H0Y6K2	Bromodomain-containing protein 2	BRD2	S304
H0Y6K2	Bromodomain-containing protein 2	BRD2	S307
H0Y6K2	Bromodomain-containing protein 2	BRD2	S43
H0Y6K2	Bromodomain-containing protein 2	BRD2	S639
A0A140TA74	Sal-like protein 3	SALL3	S1101
A0A140TA74	Sal-like protein 3	SALL3	S35
A0A1B0GTL5	Rab11 family-interacting protein 5	RAB11FIP5	S1224
A0A1B0GTN9	Pleckstrin homology domain-containing family A member 7	PLEKHA7	S511
A0A1B0GTN9	Pleckstrin homology domain-containing family A member 7	PLEKHA7	T371
A0A1B0GTW1	Tight junction protein ZO-2	TJP2	S1218
A0A1B0GTW1	Tight junction protein ZO-2	TJP2	S189
A0A1B0GTW1	Tight junction protein ZO-2	TJP2	S972
A0A1B0GTW1	Tight junction protein ZO-2	TJP2	S1126
A0A1B0GTW1	Tight junction protein ZO-2	TJP2	Y1225
A0A1B0GTW1	Tight junction protein ZO-2	TJP2	Y1177
A0A1B0GTW1	Tight junction protein ZO-2	TJP2	Y970
A0A1B0GTW1	Tight junction protein ZO-2	TJP2	Y565
A0A1B0GWG1	Uncharacterized protein KIAA1107	KIAA1107	S698
A0A1B0GWG1	Uncharacterized protein KIAA1107	KIAA1107	Y800
A0A1B0GU24	Trinucleotide repeat-containing gene 6C protein	TNRC6C	S924
A0A1B0GUH9	Ligand-dependent corepressor	LCOR	S14
A0A1B0GUI1	Ral GTPase-activating protein subunit alpha-1	RALGAPA1	S1319
A0A1B0GUN5	Pleckstrin homology domain-containing family A member 6	PLEKHA6	S966
A0A1B0GUQ4	FERM and PDZ domain-containing protein 2	FRMPD2	S418
A0A1B0GUQ4	FERM and PDZ domain-containing protein 2	FRMPD2	T417
A0A1B0GUQ4	FERM and PDZ domain-containing protein 2	FRMPD2	T421
A0A1B0GUS7	Protein unc-13 homolog B	UNC13B	S3370
A0A1B0GUS7	Protein unc-13 homolog B	UNC13B	S3379
A0A1B0GUS7	Protein unc-13 homolog B	UNC13B	T3367
A0A1B0GUS7	Protein unc-13 homolog B	UNC13B	T3375
A0A1B0GUS7	Protein unc-13 homolog B	UNC13B	T3381
A0A1B0GUZ7	Protein EFR3 homolog A	EFR3A	S721
A0A1B0GWI0	Zinc finger E-box-binding homeobox 2	ZEB2	S101
A0A1B0GWI0	Zinc finger E-box-binding homeobox 2	ZEB2	S472
A0A1B0GV57	TGF-beta-activated kinase 1 and MAP3K7-binding protein 2	TAB2	S298
A0A1B0GV57	TGF-beta-activated kinase 1 and MAP3K7-binding protein 2	TAB2	S300
A0A1B0GVH1	Transcription factor Sp2	SP2	S71
E7EUR8	Protein FAM193A	FAM193A	S247
E7EUR8	Protein FAM193A	FAM193A	S147
E7EUR8	Protein FAM193A	FAM193A	S156
E7EUR8	Protein FAM193A	FAM193A	S998
E7EUR8	Protein FAM193A	FAM193A	S531
E7EUR8	Protein FAM193A	FAM193A	S496
A0A1B0GVY1	E3 ubiquitin-protein ligase NEDD4-like	NEDD4L	S727
A0A1B0GVY1	E3 ubiquitin-protein ligase NEDD4-like	NEDD4L	S582
A0A1B0GWK2	Kazrin	KAZN	S475
A0A1B0GWK2	Kazrin	KAZN	S406
A0A1B0GXI6	Vacuolar protein sorting-associated protein 45	VPS45	S18
E7EUF7	Receptor expression-enhancing protein;Receptor expression-enhancing protein 1	REEP1	S159
M0R1B5	Acetolactate synthase-like protein	ILVBL	S60
A2A274	Aconitate hydratase, mitochondrial	ACO2	S113
A2A274	Aconitate hydratase, mitochondrial	ACO2	S116
A2A274	Aconitate hydratase, mitochondrial	ACO2	T102
A2A2G5	Gamma-glutamyltransferase 7;Gamma-glutamyltransferase 7 heavy chain;Gamma-glutamyltransferase 7 light chain	GGT7	S89
A2A2G5	Gamma-glutamyltransferase 7;Gamma-glutamyltransferase 7 heavy chain;Gamma-glutamyltransferase 7 light chain	GGT7	S92
A2A341	Synaptonemal complex protein 2	SYCP2	S803
A2A341	Synaptonemal complex protein 2	SYCP2	S806
A2A341	Synaptonemal complex protein 2	SYCP2	T798
A2A370	Dedicator of cytokinesis protein 8	DOCK8	S386
A2A370	Dedicator of cytokinesis protein 8	DOCK8	T390
A2RRE0	WD repeat-containing protein 7	WDR7	S260
B7ZLP8	Probable threonine--tRNA ligase 2, cytoplasmic	TARSL2	S525
B7ZM87	SLIT-ROBO Rho GTPase-activating protein 2	SRGAP2	S904
B7ZM87	SLIT-ROBO Rho GTPase-activating protein 2	SRGAP2	S875
B7ZM87	SLIT-ROBO Rho GTPase-activating protein 2	SRGAP2	S876
B7ZM87	SLIT-ROBO Rho GTPase-activating protein 2	SRGAP2	S1012
B7ZM87	SLIT-ROBO Rho GTPase-activating protein 2	SRGAP2	S992
B7ZM87	SLIT-ROBO Rho GTPase-activating protein 2	SRGAP2	Y829
A2VCS9		MAP9	S154
A2VCS9	Microtubule-associated protein 9	MAP9	S391
C9J1X0	WD repeat-containing protein 91	WDR91	S412
A6NCC9	Protein TSSC4	TSSC4	S68
K7EKN5	Paralemmin-3	PALM3	S92
K7EKN5	Paralemmin-3	PALM3	S104
K7EKN5	Paralemmin-3	PALM3	T100
A6NF31	Oral-facial-digital syndrome 1 protein	OFD1	S529
A6NF31	Oral-facial-digital syndrome 1 protein	OFD1	Y418
A6NF31	Oral-facial-digital syndrome 1 protein	OFD1	Y611
A6NF51	3'(2'),5'-bisphosphate nucleotidase 1	BPNT1	S255
J3KNC3	Single-pass membrane and coiled-coil domain-containing protein 2	SMCO2	S13
A6NFV8	Dysbindin	DTNBP1	S304
A6NGY7	Protein bicaudal C homolog 1	BICC1	S305
A6NHN7	Zinc finger MYM-type protein 3	ZMYM3	S466
A6NHN7	Zinc finger MYM-type protein 3	ZMYM3	T819
D6R9V6	Rho GTPase-activating protein 22	ARHGAP22	S228
A6NIT2	Phosphorylase b kinase regulatory subunit alpha, skeletal muscle isoform	PHKA1	S699
A6NIT2	Phosphorylase b kinase regulatory subunit alpha, skeletal muscle isoform	PHKA1	S676
A6NIT2	Phosphorylase b kinase regulatory subunit alpha, skeletal muscle isoform	PHKA1	S926
A6NIW2	Dedicator of cytokinesis protein 11	DOCK11	S1281
A6NIW2	Dedicator of cytokinesis protein 11	DOCK11	Y1286
A6NJA2	Ubiquitin carboxyl-terminal hydrolase;Ubiquitin carboxyl-terminal hydrolase 14	USP14	S97
F8WC89	SAC3 domain-containing protein 1	SAC3D1	S356
A6NN40	Protein Shroom1	SHROOM1	S666
A6NNN6	Pericentriolar material 1 protein	PCM1	S1722
A6NNN6	Pericentriolar material 1 protein	PCM1	S1757
A6NNN6	Pericentriolar material 1 protein	PCM1	S1760
A6NNN6	Pericentriolar material 1 protein	PCM1	S1950
A6NNN6		PCM1	S1319
E7ETA6		PCM1	T1557
A6NNN6	Pericentriolar material 1 protein	PCM1	Y1968
A6PVK7	Uncharacterized protein C9orf84	C9orf84	S1180
A6PVK7	Uncharacterized protein C9orf84	C9orf84	S1188
A6PVU8	Tuftelin	TUFT1	S323
A6PW57	Phosphatidylinositol 4-phosphate 5-kinase type-1 alpha	PIP5K1A	S474
A6PW57	Phosphatidylinositol 4-phosphate 5-kinase type-1 alpha	PIP5K1A	Y471
H7BZ52	Zinc finger SWIM domain-containing protein 8	ZSWIM8	S1090
C9JBS6	Rap guanine nucleotide exchange factor 5	RAPGEF5	S113
A8MST6	Centrosomal protein of 78 kDa	CEP78	S300
A8MXB7	Sorting nexin-24	SNX24	S149
A9Z1X7	Serine/arginine repetitive matrix protein 1	SRRM1	S458
A9Z1X7	Serine/arginine repetitive matrix protein 1	SRRM1	S460
A9Z1X7	Serine/arginine repetitive matrix protein 1	SRRM1	S384
A9Z1X7	Serine/arginine repetitive matrix protein 1	SRRM1	S386
A9Z1X7	Serine/arginine repetitive matrix protein 1	SRRM1	S388
M0R088		SRRM1	S390
M0R088		SRRM1	S397
M0R088		SRRM1	T396
B0QY16	Uncharacterized protein KIAA0930	KIAA0930	S209
B0QY16	Uncharacterized protein KIAA0930	KIAA0930	S189
B0QY16	Uncharacterized protein KIAA0930	KIAA0930	S191
B0QY16	Uncharacterized protein KIAA0930	KIAA0930	S247
B0QY16	Uncharacterized protein KIAA0930	KIAA0930	S164
B0QY16	Uncharacterized protein KIAA0930	KIAA0930	T178
B0QYS6	Transcription factor EB	TFEB	S483
B1AKC9	Receptor protein-tyrosine kinase;Ephrin type-B receptor 2	EPHB2	S771
B1AKC9	Receptor protein-tyrosine kinase;Ephrin type-B receptor 2	EPHB2	Y572
B1AKC9	Receptor protein-tyrosine kinase;Ephrin type-B receptor 2	EPHB2	Y775
D6RA28	Arginine-glutamic acid dipeptide repeats protein	RERE	S14
S4R3W2	Nuclear factor 1;Nuclear factor 1 A-type	NFIA	S47
S4R3W2	Nuclear factor 1;Nuclear factor 1 A-type	NFIA	S54
S4R3W2	Nuclear factor 1;Nuclear factor 1 A-type	NFIA	S32
S4R3W2	Nuclear factor 1;Nuclear factor 1 A-type	NFIA	S35
S4R3W2	Nuclear factor 1;Nuclear factor 1 A-type	NFIA	S67
B1AKZ5	Astrocytic phosphoprotein PEA-15	PEA15	S94
B1ALK7		ARHGEF7	S638
B1ALK7		ARHGEF7	S619
B1ALK7	Rho guanine nucleotide exchange factor 7	ARHGEF7	S79
B1ALM5	Transmembrane protein 9	TMEM9	S140
B1ALM5	Transmembrane protein 9	TMEM9	S147
B1AMW1	Lymphocyte function-associated antigen 3	CD58	S172
B1ANE3	Methionine synthase	MTR	S54
B1ANE3	Methionine synthase	MTR	Y325
B1AP22	Presenilin;Presenilin-2;Presenilin-2 NTF subunit;Presenilin-2 CTF subunit	PSEN2	S55
B1AP22	Presenilin;Presenilin-2;Presenilin-2 NTF subunit;Presenilin-2 CTF subunit	PSEN2	S58
B1AP22	Presenilin;Presenilin-2;Presenilin-2 NTF subunit;Presenilin-2 CTF subunit	PSEN2	Y96
B1APE1	Transcription initiation factor IIB	GTF2B	S75
B1APY4	Tyrosine-protein kinase transmembrane receptor ROR2	ROR2	S309
B1AUU8	Epidermal growth factor receptor substrate 15	EPS15	S662
B1AUU8	Epidermal growth factor receptor substrate 15	EPS15	S612
B1AUU8	Epidermal growth factor receptor substrate 15	EPS15	S656
B1AVT0	Dual specificity protein kinase CLK2	CLK2	S140
H7BXF4	Sphingomyelin phosphodiesterase 4	SMPD4	S169
H7BXF4	Sphingomyelin phosphodiesterase 4	SMPD4	S281
H7BXF4	Sphingomyelin phosphodiesterase 4	SMPD4	S763
H7BXF4	Sphingomyelin phosphodiesterase 4	SMPD4	T679
E9PM17	Non-specific serine/threonine protein kinase;Serine/threonine-protein kinase PAK 1	PAK1	S76
E9PM17	Non-specific serine/threonine protein kinase;Serine/threonine-protein kinase PAK 1	PAK1	S35
E9PM17	Non-specific serine/threonine protein kinase;Serine/threonine-protein kinase PAK 1	PAK1	S106
E9PM17	Non-specific serine/threonine protein kinase;Serine/threonine-protein kinase PAK 1	PAK1	S46
E9PM17	Non-specific serine/threonine protein kinase;Serine/threonine-protein kinase PAK 1	PAK1	T127
E9PM17	Non-specific serine/threonine protein kinase;Serine/threonine-protein kinase PAK 1	PAK1	T132
E9PM17	Non-specific serine/threonine protein kinase;Serine/threonine-protein kinase PAK 1	PAK1	T114
B3KSJ7	Protein artemis	DCLRE1C	S38
B3KT64	Transmembrane protein 108	TMEM108	S69
B3VCF6		CHN2	S3
H0Y5J4	Drebrin-like protein	DBNL	S198
H0Y5J4	Drebrin-like protein	DBNL	S212
H0Y5J4	Drebrin-like protein	DBNL	T220
H0Y5J4	Drebrin-like protein	DBNL	Y91
B4DE60	Receptor expression-enhancing protein;Receptor expression-enhancing protein 2	REEP2	S112
B4DF95	Phosphatidylinositol 4,5-bisphosphate 5-phosphatase A	INPP5J	S923
B4DF95	Phosphatidylinositol 4,5-bisphosphate 5-phosphatase A	INPP5J	S83
B4DFG0	Protein DEK	DEK	S273
B4DFG0	Protein DEK	DEK	S275
B4DFG0	Protein DEK	DEK	S278
B4DGU4	Catenin beta-1	CTNNB1	S184
B4DGU4	Catenin beta-1	CTNNB1	S545
G8JLH2	M-phase inducer phosphatase 2	CDC25B	S284
C9JM82	Septin-5	SEPT5	S178
C9JM82	Septin-5	SEPT5	S280
H3BRY6	von Willebrand factor A domain-containing protein 9	VWA9	S323
B4DJX4	Pleckstrin homology domain-containing family A member 5	PLEKHA5	S32
B4DJX4	Pleckstrin homology domain-containing family A member 5	PLEKHA5	S888
B4DJX4	Pleckstrin homology domain-containing family A member 5	PLEKHA5	S892
B4DJX4	Pleckstrin homology domain-containing family A member 5	PLEKHA5	S274
B4DJX4	Pleckstrin homology domain-containing family A member 5	PLEKHA5	S302
B4DJX4	Pleckstrin homology domain-containing family A member 5	PLEKHA5	T330
B4DJX4	Pleckstrin homology domain-containing family A member 5	PLEKHA5	Y26
B4DJX4	Pleckstrin homology domain-containing family A member 5	PLEKHA5	Y290
B4DJX4	Pleckstrin homology domain-containing family A member 5	PLEKHA5	Y245
J3QQK2	Transmembrane protein 104	TMEM104	S46
J3QQK2	Transmembrane protein 104	TMEM104	S52
J3QQK2	Transmembrane protein 104	TMEM104	T59
B4DKY1	Cysteine--tRNA ligase, cytoplasmic	CARS	S320
C9JUN4	Phosphoribosyl pyrophosphate synthase-associated protein 1	PRPSAP1	S141
B4DRN8	Palmitoyltransferase;Probable palmitoyltransferase ZDHHC20	ZDHHC20	S242
B4DRN8	Palmitoyltransferase;Probable palmitoyltransferase ZDHHC20	ZDHHC20	Y249
B4DTR1	Receptor protein-tyrosine kinase;Receptor tyrosine-protein kinase erbB-2	ERBB2	S722
B4DTR1	Receptor protein-tyrosine kinase;Receptor tyrosine-protein kinase erbB-2	ERBB2	S831
B4DTR1	Receptor protein-tyrosine kinase;Receptor tyrosine-protein kinase erbB-2	ERBB2	T599
B4DTR1	Receptor protein-tyrosine kinase;Receptor tyrosine-protein kinase erbB-2	ERBB2	T425
B4DTR1	Receptor protein-tyrosine kinase;Receptor tyrosine-protein kinase erbB-2	ERBB2	Y972
B4DTR1	Receptor protein-tyrosine kinase;Receptor tyrosine-protein kinase erbB-2	ERBB2	Y601
B4DTS2	Serine/threonine-protein kinase;Serine/threonine-protein kinase D2	PRKD2	S886
B4DUJ5	Coiled-coil domain-containing protein 28A	CCDC28A	S13
B4DUJ5	Coiled-coil domain-containing protein 28A	CCDC28A	T72
B4DUJ5	Coiled-coil domain-containing protein 28A	CCDC28A	T80
B4DUR8	T-complex protein 1 subunit gamma	CCT3	S199
B4DUR8	T-complex protein 1 subunit gamma	CCT3	S207
B4DWG0	RCC1 and BTB domain-containing protein 2	RCBTB2	S26
B4DWG0	RCC1 and BTB domain-containing protein 2	RCBTB2	S27
B4DWG0	RCC1 and BTB domain-containing protein 2	RCBTB2	T24
E7EU85	Fragile X mental retardation syndrome-related protein 1	FXR1	S318
E7EU85	Fragile X mental retardation syndrome-related protein 1	FXR1	S321
E7EU85	Fragile X mental retardation syndrome-related protein 1	FXR1	S324
E7EU85	Fragile X mental retardation syndrome-related protein 1	FXR1	S335
E7EU85	Fragile X mental retardation syndrome-related protein 1	FXR1	S338
B4DY08		HNRNPC	S247
G3V2Q1	Heterogeneous nuclear ribonucleoproteins C1/C2	HNRNPC	S285
G3V2Q1	Heterogeneous nuclear ribonucleoproteins C1/C2	HNRNPC	S246
B4E135	DNA ligase;DNA ligase 1	LIG1	S200
B4E135	DNA ligase;DNA ligase 1	LIG1	S228
B4E135	DNA ligase;DNA ligase 1	LIG1	T194
B4E2Q0	Calcium-transporting ATPase;Calcium-transporting ATPase type 2C member 1	ATP2C1	S625
B4E2Q0	Calcium-transporting ATPase;Calcium-transporting ATPase type 2C member 1	ATP2C1	S629
B4E2Q0	Calcium-transporting ATPase;Calcium-transporting ATPase type 2C member 1	ATP2C1	T624
G3V1N5	Ubiquitin carboxyl-terminal hydrolase;Ubiquitin carboxyl-terminal hydrolase 28	USP28	S729
G3V1N5	Ubiquitin carboxyl-terminal hydrolase;Ubiquitin carboxyl-terminal hydrolase 28	USP28	S603
G3V1N5	Ubiquitin carboxyl-terminal hydrolase;Ubiquitin carboxyl-terminal hydrolase 28	USP28	Y590
G3V1N5	Ubiquitin carboxyl-terminal hydrolase;Ubiquitin carboxyl-terminal hydrolase 28	USP28	Y601
B5MBX5	Protein LBH	LBH	S46
H7C325	Disks large homolog 2	DLG2	S152
B5MCN7	Nuclear receptor coactivator 1	NCOA1	S221
B5MCN7	Nuclear receptor coactivator 1	NCOA1	S547
B5MD46	TBC1 domain family member 10A	TBC1D10A	S319
B5MD46	TBC1 domain family member 10A	TBC1D10A	S321
B5MDQ0	DNA excision repair protein ERCC-6-like	ERCC6L	S741
B5MDQ0	DNA excision repair protein ERCC-6-like	ERCC6L	S697
B5MDQ0	DNA excision repair protein ERCC-6-like	ERCC6L	S706
B5MDQ0	DNA excision repair protein ERCC-6-like	ERCC6L	S905
B5MDQ0	DNA excision repair protein ERCC-6-like	ERCC6L	S994
B5MDQ0	DNA excision repair protein ERCC-6-like	ERCC6L	S632
B5MDQ0	DNA excision repair protein ERCC-6-like	ERCC6L	S651
B5MDQ0	DNA excision repair protein ERCC-6-like	ERCC6L	S845
B5MDQ0	DNA excision repair protein ERCC-6-like	ERCC6L	S848
B5MDQ0	DNA excision repair protein ERCC-6-like	ERCC6L	S877
B5MDQ0	DNA excision repair protein ERCC-6-like	ERCC6L	Y573
B5MDQ0	DNA excision repair protein ERCC-6-like	ERCC6L	Y744
E7EW69	Septin-10	SEPT10	S343
B7WPE2	Echinoderm microtubule-associated protein-like 3	EML3	S888
F8W9A8	Inositol hexakisphosphate and diphosphoinositol-pentakisphosphate kinase 1	PPIP5K1	S1049
F8W9A8	Inositol hexakisphosphate and diphosphoinositol-pentakisphosphate kinase 1	PPIP5K1	S706
F8W9A8	Inositol hexakisphosphate and diphosphoinositol-pentakisphosphate kinase 1	PPIP5K1	T708
F8W9A8	Inositol hexakisphosphate and diphosphoinositol-pentakisphosphate kinase 1	PPIP5K1	Y704
F5H3S6	TOM1-like protein 2	TOM1L2	S360
F5H3S6	TOM1-like protein 2	TOM1L2	T255
F5H3S6	TOM1-like protein 2	TOM1L2	Y256
B7Z3B5	Ribosomal protein S6 kinase;Ribosomal protein S6 kinase alpha-2	RPS6KA2	S590
B7Z3B9	GRB2-associated-binding protein 1	GAB1	S201
B7Z3B9	GRB2-associated-binding protein 1	GAB1	S448
B7Z3B9	GRB2-associated-binding protein 1	GAB1	Y156
B7Z3B9	GRB2-associated-binding protein 1	GAB1	Y303
B7Z3B9	GRB2-associated-binding protein 1	GAB1	Y139
B7Z3B9	GRB2-associated-binding protein 1	GAB1	Y204
B7Z3B9	GRB2-associated-binding protein 1	GAB1	Y214
B7Z3B9	GRB2-associated-binding protein 1	GAB1	Y524
B7Z3B9	GRB2-associated-binding protein 1	GAB1	Y556
B7Z3B9	GRB2-associated-binding protein 1	GAB1	Y182
B7Z4K4	Putative tRNA (cytidine(32)/guanosine(34)-2'-O)-methyltransferase	FTSJ1	S191
B7Z4K4	Putative tRNA (cytidine(32)/guanosine(34)-2'-O)-methyltransferase	FTSJ1	S134
B7Z4K4	Putative tRNA (cytidine(32)/guanosine(34)-2'-O)-methyltransferase	FTSJ1	Y123
B7Z4K4	Putative tRNA (cytidine(32)/guanosine(34)-2'-O)-methyltransferase	FTSJ1	Y137
B7Z5R6	Next to BRCA1 gene 1 protein	NBR1	S635
B7Z5R6	Next to BRCA1 gene 1 protein	NBR1	Y93
B7Z685	Guanylate cyclase soluble subunit beta-1	GUCY1B3	S510
B7Z685	Guanylate cyclase soluble subunit beta-1	GUCY1B3	S523
F8WF16	Periphilin-1	PPHLN1	S85
F8WF16	Periphilin-1	PPHLN1	S258
B7Z9X4	Protein NDRG4	NDRG4	S249
B8ZZB2	Type I inositol 3,4-bisphosphate 4-phosphatase	INPP4A	S284
H7C3L5	Tax1-binding protein 1	TAX1BP1	S203
B8ZZS2	NGFI-A-binding protein 1	NAB1	S394
B8ZZS4	Ankyrin repeat and zinc finger domain-containing protein 1	ANKZF1	S465
B8ZZS4	Ankyrin repeat and zinc finger domain-containing protein 1	ANKZF1	T397
B8ZZS4	Ankyrin repeat and zinc finger domain-containing protein 1	ANKZF1	T464
B8ZZU6	Cyclic AMP-dependent transcription factor ATF-2	ATF2	S94
B8ZZU6	Cyclic AMP-dependent transcription factor ATF-2	ATF2	S44
B8ZZU6	Cyclic AMP-dependent transcription factor ATF-2	ATF2	S150
B8ZZU6	Cyclic AMP-dependent transcription factor ATF-2	ATF2	T98
B8ZZU6	Cyclic AMP-dependent transcription factor ATF-2	ATF2	T51
B8ZZU6	Cyclic AMP-dependent transcription factor ATF-2	ATF2	T53
H7C0I1	Late secretory pathway protein AVL9 homolog	AVL9	S175
H7C0I1	Late secretory pathway protein AVL9 homolog	AVL9	S177
H7BZD7	TBC1 domain family member 14	TBC1D14	S60
H7BZD7	TBC1 domain family member 14	TBC1D14	T61
B9EGQ5	Protein Wiz	WIZ	S164
B9EGQ5	Protein Wiz	WIZ	S327
B9EGQ5	Protein Wiz	WIZ	S332
B9EGQ5	Protein Wiz	WIZ	S336
B9EGQ5	Protein Wiz	WIZ	S177
B9EGQ5	Protein Wiz	WIZ	S187
B9EGQ5	Protein Wiz	WIZ	S193
B9EGQ5	Protein Wiz	WIZ	S198
B9EGQ5	Protein Wiz	WIZ	S308
B9EGQ5	Protein Wiz	WIZ	S310
B9EGQ5	Protein Wiz	WIZ	S315
B9EGQ5	Protein Wiz	WIZ	T518
B9EGQ5	Protein Wiz	WIZ	T334
B9EGQ5	Protein Wiz	WIZ	T340
B9ZVN9	DNA-directed RNA polymerase;DNA-directed RNA polymerase I subunit RPA1	POLR1A	S893
B9ZVN9	DNA-directed RNA polymerase;DNA-directed RNA polymerase I subunit RPA1	POLR1A	S900
C9IYM9	cAMP-responsive element modulator	CREM	S80
C9JA25	Elongation factor G, mitochondrial	GFM1	S16
C9IZX4	Connector enhancer of kinase suppressor of ras 3	CNKSR3	S303
C9J0A7	Charged multivesicular body protein 2b	CHMP2B	S169
C9J0I9	Nuclear-interacting partner of ALK	ZC3HC1	S278
C9J0I9	Nuclear-interacting partner of ALK	ZC3HC1	S351
C9J0I9	Nuclear-interacting partner of ALK	ZC3HC1	S352
C9J0I9	Nuclear-interacting partner of ALK	ZC3HC1	S292
C9J0I9	Nuclear-interacting partner of ALK	ZC3HC1	S295
C9J0I9	Nuclear-interacting partner of ALK	ZC3HC1	S301
C9J0I9	Nuclear-interacting partner of ALK	ZC3HC1	S311
C9J0I9	Nuclear-interacting partner of ALK	ZC3HC1	S316
C9J0I9	Nuclear-interacting partner of ALK	ZC3HC1	S327
C9J0I9	Nuclear-interacting partner of ALK	ZC3HC1	T344
C9J119	Pleckstrin homology domain-containing family M member 3	PLEKHM3	S115
C9J185	Eukaryotic translation initiation factor 2-alpha kinase 3	EIF2AK3	S594
C9J185	Eukaryotic translation initiation factor 2-alpha kinase 3	EIF2AK3	S683
C9J2P9	E3 ubiquitin-protein ligase Hakai	CBLL1	S151
C9J2P9	E3 ubiquitin-protein ligase Hakai	CBLL1	S240
C9J494	Probable E3 ubiquitin-protein ligase makorin-2	MKRN2	S137
C9J519	Dyslexia-associated protein KIAA0319-like protein	KIAA0319L	S415
C9J5J4	Protein lin-9 homolog	LIN9	S159
C9J5J4	Protein lin-9 homolog	LIN9	S290
C9JP83	Nuclear valosin-containing protein-like	NVL	S107
C9JP83	Nuclear valosin-containing protein-like	NVL	T74
C9J6V4	Rho GTPase-activating protein 26	ARHGAP26	S74
[truncated: 1,881 more rows]
